# Supplementary material for: Hsa_circ_0003998 promotes epithelial to mesenchymal transition of hepatocellular carcinoma by sponging miR-143-3p and PCBP1
Source: Springer Nature journal article supplement (doi:10.1186/s13046-020-01576-0), 2020-06-17
Supplement: MOESM3 [file 18093322]

**Predicted target genes for hsa-miR-143-3p**

# Column A: Seqname, the name the sequence.

# Column B: GeneSymbol, the official gene symbol of the sequence.

# Column C: Type, the type of the transcript.

# Column D: Diagrams, the diagrams illustrate key features for miRNA binding.

# Column E: Total, the total number of the binding sites on the targets.

# Column F: Context+, the sum of the context+ scores used in TargetScan after version 6.0. More negative is better.

# Column G: Context, the sum of the context scores used in TargetScan before version 5.x. More negative is better.

# Column H: Structure, the sum of the structure scores used in miRanda. The higher the better.

# Column I: Energy, the sum of the free energy predicted by miRanda. More negative is better.

# Column J: Branch Length, the sum of the branch length in the phylogenetic tree of different species. The higher means the binding site is more conserved.

# Column K: Pct, the probability of preferentially conserved targeting. This score reflected the Bayesian estimate of the probability that a site is conserved due to selective maintenance of miRNA targeting rather than by chance or any other reason not pertinent to miRNA targeting.

# Column L ~ Column W: Counting numbers for different seed match types.

| Target genes for hsa-miR-143-3p |            |            |          |         |           |              |        |                 |      |         |         |      |        |                        |      |         |         |      |        |             |     |        |
|---------------------------------|------------|------------|----------|---------|-----------|--------------|--------|-----------------|------|---------|---------|------|--------|------------------------|------|---------|---------|------|--------|-------------|-----|--------|
| Target                          |            | TargetScan |          | miRanda |           | Conservation |        | Conserved Sites |      |         |         |      |        | Poorly Conserved Sites |      |         |         |      |        | Annotations |     |        |
| Seqname                         | GeneSymbol | Type       | Context+ | Context | Structure | Energy       | Branch | LePct           | 8mer | 7mer-m8 | 7mer-A1 | 6mer | Offset | 6mImperfect            | 8mer | 7mer-m8 | 7mer-A1 | 6mer | Offset | 6mImperfect | UTR | Length |
| NM_001012                       | DISC1      | Coding     | -0.7     | -0.833  | 300       | -36.72       | 0      | 0.012           | 0    | 0       | 0       | 0    | 0      | 0                      | 2    | 0       | 0       | 0    | 0      | 0           | 0   | 4442   |
| NM_001164                       | DISC1      | Coding     | -0.7     | -0.833  | 300       | -36.72       | 0      | 0.012           | 0    | 0       | 0       | 0    | 0      | 0                      | 2    | 0       | 0       | 0    | 0      | 0           | 0   | 4442   |
| NM_001164                       | DISC1      | Coding     | -0.7     | -0.833  | 300       | -36.72       | 0      | 0.012           | 0    | 0       | 0       | 0    | 0      | 0                      | 2    | 0       | 0       | 0    | 0      | 0           | 0   | 4442   |
| NM_018662                       | DISC1      | Coding     | -0.7     | -0.833  | 300       | -36.72       | 0      | 0.012           | 0    | 0       | 0       | 0    | 0      | 0                      | 2    | 0       | 0       | 0    | 0      | 0           | 0   | 4442   |
| NM_014909                       | VASH1      | Coding     | -0.596   | -0.706  | 301       | -36.09       | 0      | 0.012           | 0    | 0       | 0       | 0    | 0      | 0                      | 2    | 0       | 0       | 0    | 0      | 0           | 0   | 4002   |
| NM_000370                       | TTPA       | Coding     | -0.529   | -0.79   | 286       | -29.46       | 0      | 0.012           | 0    | 0       | 0       | 0    | 0      | 0                      | 2    | 0       | 0       | 0    | 0      | 0           | 0   | 1763   |
| NM_005358                       | LMO7       | Coding     | -0.51    | -0.659  | 288       | -30.25       | 0      | 0.115           | 0    | 0       | 0       | 0    | 0      | 0                      | 1    | 1       | 0       | 0    | 0      | 0           | 0   | 1927   |
| NM_001306                       | LMO7       | Coding     | -0.51    | -0.659  | 288       | -30.25       | 0      | 0.115           | 0    | 0       | 0       | 0    | 0      | 0                      | 1    | 1       | 0       | 0    | 0      | 0           | 0   | 1927   |
| NM_015842                       | LMO7       | Coding     | -0.51    | -0.659  | 288       | -30.25       | 0      | 0.115           | 0    | 0       | 0       | 0    | 0      | 0                      | 1    | 1       | 0       | 0    | 0      | 0           | 0   | 1857   |
| NM_001195                       | DENND1B    | Coding     | -0.5     | -0.785  | 317       | -36.46       | 0      | 0.115           | 0    | 0       | 0       | 0    | 0      | 0                      | 1    | 1       | 0       | 0    | 0      | 0           | 0   | 5711   |
| NM_170721                       | MSI2       | Coding     | -0.477   | -0.566  | 304       | -33.62       | 0      | 0.115           | 0    | 0       | 0       | 0    | 0      | 0                      | 1    | 1       | 0       | 0    | 0      | 0           | 0   | 1352   |
| NM_001322                       | MSI2       | Coding     | -0.477   | -0.566  | 304       | -33.62       | 0      | 0.115           | 0    | 0       | 0       | 0    | 0      | 0                      | 1    | 1       | 0       | 0    | 0      | 0           | 0   | 1352   |
| NM_001160                       | HRH4       | Coding     | -0.467   | -0.604  | 295       | -33.46       | 0      | 0.115           | 0    | 0       | 0       | 0    | 0      | 0                      | 1    | 1       | 0       | 0    | 0      | 0           | 0   | 3200   |
| NM_001168                       | ABL2       | Coding     | -0.428   | -0.482  | 163       | -20.47       | 0      | 0.006           | 0    | 0       | 0       | 0    | 0      | 0                      | 1    | 0       | 0       | 0    | 0      | 0           | 0   | 8391   |
| NM_001168                       | ABL2       | Coding     | -0.428   | -0.482  | 163       | -20.47       | 0      | 0.006           | 0    | 0       | 0       | 0    | 0      | 0                      | 1    | 0       | 0       | 0    | 0      | 0           | 0   | 8391   |
| NM_001168                       | ABL2       | Coding     | -0.428   | -0.482  | 163       | -20.47       | 0      | 0.006           | 0    | 0       | 0       | 0    | 0      | 0                      | 1    | 0       | 0       | 0    | 0      | 0           | 0   | 8391   |
| NM_007314                       | ABL2       | Coding     | -0.428   | -0.482  | 163       | -20.47       | 0      | 0.006           | 0    | 0       | 0       | 0    | 0      | 0                      | 1    | 0       | 0       | 0    | 0      | 0           | 0   | 8391   |
| NM_001136                       | ABL2       | Coding     | -0.428   | -0.482  | 163       | -20.47       | 0      | 0.006           | 0    | 0       | 0       | 0    | 0      | 0                      | 1    | 0       | 0       | 0    | 0      | 0           | 0   | 8391   |
| NM_005158                       | ABL2       | Coding     | -0.428   | -0.482  | 163       | -20.47       | 0      | 0.006           | 0    | 0       | 0       | 0    | 0      | 0                      | 1    | 0       | 0       | 0    | 0      | 0           | 0   | 8391   |
| NM_001168                       | ABL2       | Coding     | -0.428   | -0.482  | 163       | -20.47       | 0      | 0.006           | 0    | 0       | 0       | 0    | 0      | 0                      | 1    | 0       | 0       | 0    | 0      | 0           | 0   | 8391   |
| NM_021999                       | ITM2B      | Coding     | -0.414   | -0.524  | 149       | -16.47       | 0      | 0.006           | 0    | 0       | 0       | 0    | 0      | 0                      | 1    | 0       | 0       | 0    | 0      | 0           | 0   | 872    |
| NM_001313                       | EIF2AK3    | Coding     | -0.405   | -0.463  | 154       | -18.42       | 0      | 0.006           | 0    | 0       | 0       | 0    | 0      | 0                      | 1    | 0       | 0       | 0    | 0      | 0           | 0   | 996    |
| NM_004836                       | EIF2AK3    | Coding     | -0.405   | -0.463  | 154       | -18.42       | 0      | 0.006           | 0    | 0       | 0       | 0    | 0      | 0                      | 1    | 0       | 0       | 0    | 0      | 0           | 0   | 996    |
| NM_001077                       | UBXN2B     | Coding     | -0.405   | -0.536  | 141       | -11.75       | 0      | 0.006           | 0    | 0       | 0       | 0    | 0      | 0                      | 1    | 0       | 0       | 0    | 0      | 0           | 0   | 3950   |
| NM_016486                       | TMEM69     | Coding     | -0.403   | -0.502  | 151       | -18.23       | 0      | 0.006           | 0    | 0       | 0       | 0    | 0      | 0                      | 1    | 0       | 0       | 0    | 0      | 0           | 0   | 531    |
| NM_001166                       | EME1       | Coding     | -0.4     | -0.47   | 169       | -22.28       | 0      | 0.006           | 0    | 0       | 0       | 0    | 0      | 0                      | 1    | 0       | 0       | 0    | 0      | 0           | 0   | 520    |
| NM_152463                       | EME1       | Coding     | -0.4     | -0.47   | 169       | -22.28       | 0      | 0.006           | 0    | 0       | 0       | 0    | 0      | 0                      | 1    | 0       | 0       | 0    | 0      | 0           | 0   | 520    |
| NM_016548                       | GOLM1      | Coding     | -0.395   | -0.494  | 148       | -13.71       | 0      | 0.006           | 0    | 0       | 0       | 0    | 0      | 0                      | 1    | 0       | 0       | 0    | 0      | 0           | 0   | 1674   |
| NM_177937                       | GOLM1      | Coding     | -0.395   | -0.494  | 148       | -13.71       | 0      | 0.006           | 0    | 0       | 0       | 0    | 0      | 0                      | 1    | 0       | 0       | 0    | 0      | 0           | 0   | 1674   |
| NM_052882                       | ZIM3       | Coding     | -0.39    | -0.517  | 148       | -17.75       | 0      | 0.006           | 0    | 0       | 0       | 0    | 0      | 0                      | 1    | 0       | 0       | 0    | 0      | 0           | 0   | 822    |
| NM_001297                       | C1RL       | Coding     | -0.387   | -0.452  | 142       | -16.83       | 0      | 0.006           | 0    | 0       | 0       | 0    | 0      | 0                      | 1    | 0       | 0       | 0    | 0      | 0           | 0   | 218    |
| NM_002010                       | FGF9       | Coding     | -0.387   | -0.506  | 154       | -14.69       | 0      | 0.006           | 0    | 0       | 0       | 0    | 0      | 0                      | 1    | 0       | 0       | 0    | 0      | 0           | 0   | 3066   |
| NM_004281                       | BAG3       | Coding     | -0.383   | -0.504  | 152       | -18.11       | 0      | 0.006           | 0    | 0       | 0       | 0    | 0      | 0                      | 1    | 0       | 0       | 0    | 0      | 0           | 0   | 535    |
| NM_214711                       | PRR27      | Coding     | -0.38    | -0.455  | 156       | -17.15       | 0      | 0.006           | 0    | 0       | 0       | 0    | 0      | 0                      | 1    | 0       | 0       | 0    | 0      | 0           | 0   | 3948   |
| NM_001010                       | ATP11C     | Coding     | -0.379   | -0.449  | 148       | -18.51       | 0      | 0.006           | 0    | 0       | 0       | 0    | 0      | 0                      | 1    | 0       | 0       | 0    | 0      | 0           | 0   | 2554   |
| NM_004768                       | SRSF11     | Coding     | -0.378   | -0.458  | 163       | -18.3        | 0      | 0.006           | 0    | 0       | 0       | 0    | 0      | 0                      | 1    | 0       | 0       | 0    | 0      | 0           | 0   | 1213   |
| NM_001190                       | SRSF11     | Coding     | -0.378   | -0.458  | 163       | -18.3        | 0      | 0.006           | 0    | 0       | 0       | 0    | 0      | 0                      | 1    | 0       | 0       | 0    | 0      | 0           | 0   | 1213   |
| NM_003676                       | DEGS1      | Coding     | -0.378   | -0.524  | 150       | -15.09       | 0      | 0.006           | 0    | 0       | 0       | 0    | 0      | 0                      | 1    | 0       | 0       | 0    | 0      | 0           | 0   | 962    |
| NM_001321                       | DEGS1      | Coding     | -0.378   | -0.524  | 150       | -15.09       | 0      | 0.006           | 0    | 0       | 0       | 0    | 0      | 0                      | 1    | 0       | 0       | 0    | 0      | 0           | 0   | 962    |
| NM_001321                       | DEGS1      | Coding     | -0.378   | -0.524  | 150       | -15.09       | 0      | 0.006           | 0    | 0       | 0       | 0    | 0      | 0                      | 1    | 0       | 0       | 0    | 0      | 0           | 0   | 1132   |
| NM_152653                       | UBE2E2     | Coding     | -0.377   | -0.493  | 151       | -17.28       | 0      | 0.006           | 0    | 0       | 0       | 0    | 0      | 0                      | 1    | 0       | 0       | 0    | 0      | 0           | 0   | 974    |

|           |              |        |        |        |     |        |   |       |   |   |   |   |   |   |   |   |   |   |   |     |      |
|-----------|--------------|--------|--------|--------|-----|--------|---|-------|---|---|---|---|---|---|---|---|---|---|---|-----|------|
| NM_001278 | IL36G        | Coding | -0.376 | -0.465 | 157 | -20.64 | 0 | 0.006 | 0 | 0 | 0 | 0 | 0 | 0 | 0 | 0 | 0 | 0 | 0 | 623 |      |
| NM_019618 | IL36G        | Coding | -0.376 | -0.465 | 157 | -20.64 | 0 | 0.006 | 0 | 0 | 0 | 0 | 0 | 0 | 1 | 0 | 0 | 0 | 0 | 0   | 623  |
| NM_052866 | ADAMTSL1     | Coding | -0.376 | -0.432 | 155 | -19.34 | 0 | 0.006 | 0 | 0 | 0 | 0 | 0 | 0 | 1 | 0 | 0 | 0 | 0 | 0   | 150  |
| NM_000259 | MYO5A        | Coding | -0.376 | -0.523 | 147 | -16.84 | 0 | 0.006 | 0 | 0 | 0 | 0 | 0 | 0 | 1 | 0 | 0 | 0 | 0 | 0   | 6413 |
| NM_001142 | MYO5A        | Coding | -0.376 | -0.523 | 147 | -16.84 | 0 | 0.006 | 0 | 0 | 0 | 0 | 0 | 0 | 1 | 0 | 0 | 0 | 0 | 0   | 6413 |
| NM_004329 | BMPRIA       | Coding | -0.37  | -0.509 | 149 | -14.72 | 0 | 0.006 | 0 | 0 | 0 | 0 | 0 | 0 | 1 | 0 | 0 | 0 | 0 | 0   | 1469 |
| NM_001242 | AHCYL1       | Coding | -0.37  | -0.498 | 148 | -14.71 | 0 | 0.006 | 0 | 0 | 0 | 0 | 0 | 0 | 1 | 0 | 0 | 0 | 0 | 0   | 2062 |
| NM_006621 | AHCYL1       | Coding | -0.37  | -0.498 | 148 | -14.71 | 0 | 0.006 | 0 | 0 | 0 | 0 | 0 | 0 | 1 | 0 | 0 | 0 | 0 | 0   | 2062 |
| NM_001242 | AHCYL1       | Coding | -0.37  | -0.498 | 148 | -14.71 | 0 | 0.006 | 0 | 0 | 0 | 0 | 0 | 0 | 1 | 0 | 0 | 0 | 0 | 0   | 2062 |
| NM_001242 | AHCYL1       | Coding | -0.37  | -0.498 | 148 | -14.71 | 0 | 0.006 | 0 | 0 | 0 | 0 | 0 | 0 | 1 | 0 | 0 | 0 | 0 | 0   | 2062 |
| NM_001242 | AHCYL1       | Coding | -0.37  | -0.498 | 148 | -14.71 | 0 | 0.006 | 0 | 0 | 0 | 0 | 0 | 0 | 1 | 0 | 0 | 0 | 0 | 0   | 2062 |
| NM_152389 | CFAP65       | Coding | -0.369 | -0.462 | 145 | -13.95 | 0 | 0.006 | 0 | 0 | 0 | 0 | 0 | 0 | 1 | 0 | 0 | 0 | 0 | 0   | 1640 |
| NM_014366 | GNL3         | Coding | -0.369 | -0.48  | 145 | -14.05 | 0 | 0.006 | 0 | 0 | 0 | 0 | 0 | 0 | 1 | 0 | 0 | 0 | 0 | 0   | 219  |
| NM_206825 | GNL3         | Coding | -0.369 | -0.48  | 145 | -14.05 | 0 | 0.006 | 0 | 0 | 0 | 0 | 0 | 0 | 1 | 0 | 0 | 0 | 0 | 0   | 219  |
| NM_206826 | GNL3         | Coding | -0.369 | -0.48  | 145 | -14.05 | 0 | 0.006 | 0 | 0 | 0 | 0 | 0 | 0 | 1 | 0 | 0 | 0 | 0 | 0   | 219  |
| NM_024490 | ATP10A       | Coding | -0.368 | -0.524 | 155 | -15.8  | 0 | 0.006 | 0 | 0 | 0 | 0 | 0 | 0 | 1 | 0 | 0 | 0 | 0 | 0   | 628  |
| NM_005253 | FOSL2        | Coding | -0.368 | -0.397 | 152 | -17.79 | 0 | 0.006 | 0 | 0 | 0 | 0 | 0 | 0 | 1 | 0 | 0 | 0 | 0 | 0   | 2201 |
| NM_001282 | FTSJ1        | Coding | -0.366 | -0.455 | 142 | -11.75 | 0 | 0.006 | 0 | 0 | 0 | 0 | 0 | 0 | 1 | 0 | 0 | 0 | 0 | 0   | 638  |
| NM_012280 | FTSJ1        | Coding | -0.366 | -0.455 | 142 | -11.75 | 0 | 0.006 | 0 | 0 | 0 | 0 | 0 | 0 | 1 | 0 | 0 | 0 | 0 | 0   | 638  |
| NM_177439 | FTSJ1        | Coding | -0.366 | -0.455 | 142 | -11.75 | 0 | 0.006 | 0 | 0 | 0 | 0 | 0 | 0 | 1 | 0 | 0 | 0 | 0 | 0   | 638  |
| NM_032849 | MEDAG        | Coding | -0.363 | -0.449 | 159 | -16.59 | 0 | 0.006 | 0 | 0 | 0 | 0 | 0 | 0 | 1 | 0 | 0 | 0 | 0 | 0   | 1137 |
| NM_001291 | WASF3        | Coding | -0.362 | -0.475 | 149 | -14.93 | 0 | 0.006 | 0 | 0 | 0 | 0 | 0 | 0 | 1 | 0 | 0 | 0 | 0 | 0   | 3100 |
| NM_006646 | WASF3        | Coding | -0.362 | -0.475 | 149 | -14.93 | 0 | 0.006 | 0 | 0 | 0 | 0 | 0 | 0 | 1 | 0 | 0 | 0 | 0 | 0   | 3100 |
| NM_173694 | ATP11C       | Coding | -0.362 | -0.438 | 148 | -18.51 | 0 | 0.006 | 0 | 0 | 0 | 0 | 0 | 0 | 1 | 0 | 0 | 0 | 0 | 0   | 2620 |
| NM_173602 | DIP2B        | Coding | -0.36  | -0.411 | 161 | -23.64 | 0 | 0.006 | 0 | 0 | 0 | 0 | 0 | 0 | 1 | 0 | 0 | 0 | 0 | 0   | 3828 |
| NM_005290 | GPR15        | Coding | -0.36  | -0.488 | 146 | -14.44 | 0 | 0.006 | 0 | 0 | 0 | 0 | 0 | 0 | 1 | 0 | 0 | 0 | 0 | 0   | 1563 |
| NM_001193 | SECISBP2L    | Coding | -0.359 | -0.425 | 162 | -20.5  | 0 | 0.006 | 0 | 0 | 0 | 0 | 0 | 0 | 1 | 0 | 0 | 0 | 0 | 0   | 3606 |
| NM_014701 | SECISBP2L    | Coding | -0.359 | -0.425 | 162 | -20.5  | 0 | 0.006 | 0 | 0 | 0 | 0 | 0 | 0 | 1 | 0 | 0 | 0 | 0 | 0   | 3606 |
| NM_152599 | MFSD6L       | Coding | -0.358 | -0.39  | 146 | -17.17 | 0 | 0.006 | 0 | 0 | 0 | 0 | 0 | 0 | 1 | 0 | 0 | 0 | 0 | 0   | 250  |
| NM_001257 | ZNF451       | Coding | -0.358 | -0.416 | 143 | -21.43 | 0 | 0.006 | 0 | 0 | 0 | 0 | 0 | 0 | 1 | 0 | 0 | 0 | 0 | 0   | 7618 |
| NM_001195 | MLLT10       | Coding | -0.357 | -0.472 | 144 | -13.44 | 0 | 0.006 | 0 | 0 | 0 | 0 | 0 | 0 | 1 | 0 | 0 | 0 | 0 | 0   | 243  |
| NM_001195 | MLLT10       | Coding | -0.357 | -0.472 | 144 | -13.44 | 0 | 0.006 | 0 | 0 | 0 | 0 | 0 | 0 | 1 | 0 | 0 | 0 | 0 | 0   | 243  |
| NM_001195 | MLLT10       | Coding | -0.357 | -0.472 | 144 | -13.44 | 0 | 0.006 | 0 | 0 | 0 | 0 | 0 | 0 | 1 | 0 | 0 | 0 | 0 | 0   | 508  |
| NM_175854 | PAN3         | Coding | -0.356 | -0.437 | 150 | -16.24 | 0 | 0.006 | 0 | 0 | 0 | 0 | 0 | 0 | 1 | 0 | 0 | 0 | 0 | 0   | 2816 |
| NM_001281 | MLIP         | Coding | -0.355 | -0.48  | 145 | -15.28 | 0 | 0.006 | 0 | 0 | 0 | 0 | 0 | 0 | 1 | 0 | 0 | 0 | 0 | 0   | 2882 |
| NM_001256 | DENND2C      | Coding | -0.354 | -0.446 | 145 | -14.15 | 0 | 0.006 | 0 | 0 | 0 | 0 | 0 | 0 | 1 | 0 | 0 | 0 | 0 | 0   | 1025 |
| NM_198459 | DENND2C      | Coding | -0.354 | -0.446 | 145 | -14.15 | 0 | 0.006 | 0 | 0 | 0 | 0 | 0 | 0 | 1 | 0 | 0 | 0 | 0 | 0   | 1025 |
| NM_145111 | FAM200A      | Coding | -0.354 | -0.451 | 157 | -23.74 | 0 | 0.006 | 0 | 0 | 0 | 0 | 0 | 0 | 1 | 0 | 0 | 0 | 0 | 0   | 386  |
| NM_000189 | HK2          | Coding | -0.354 | -0.414 | 152 | -16.54 | 0 | 0.006 | 0 | 0 | 0 | 0 | 0 | 0 | 1 | 0 | 0 | 0 | 0 | 0   | 2413 |
| NM_001112 | VAX1         | Coding | -0.351 | -0.433 | 155 | -19.92 | 0 | 0.006 | 0 | 0 | 0 | 0 | 0 | 0 | 1 | 0 | 0 | 0 | 0 | 0   | 718  |
| NM_001184 | GYG2         | Coding | -0.349 | -0.421 | 154 | -15.57 | 0 | 0.006 | 0 | 0 | 0 | 0 | 0 | 0 | 1 | 0 | 0 | 0 | 0 | 0   | 1607 |
| NM_001184 | GYG2         | Coding | -0.349 | -0.421 | 154 | -15.57 | 0 | 0.006 | 0 | 0 | 0 | 0 | 0 | 0 | 1 | 0 | 0 | 0 | 0 | 0   | 1607 |
| NM_001184 | GYG2         | Coding | -0.349 | -0.421 | 154 | -15.57 | 0 | 0.006 | 0 | 0 | 0 | 0 | 0 | 0 | 1 | 0 | 0 | 0 | 0 | 0   | 1607 |
| NM_003918 | GYG2         | Coding | -0.349 | -0.421 | 154 | -15.57 | 0 | 0.006 | 0 | 0 | 0 | 0 | 0 | 0 | 1 | 0 | 0 | 0 | 0 | 0   | 1607 |
| NM_001079 | GYG2         | Coding | -0.349 | -0.421 | 154 | -15.57 | 0 | 0.006 | 0 | 0 | 0 | 0 | 0 | 0 | 1 | 0 | 0 | 0 | 0 | 0   | 1607 |
| NM_017433 | MYO3A        | Coding | -0.349 | -0.439 | 153 | -16.05 | 0 | 0.006 | 0 | 0 | 0 | 0 | 0 | 0 | 1 | 0 | 0 | 0 | 0 | 0   | 573  |
| NM_001159 | SLC39A11     | Coding | -0.349 | -0.449 | 152 | -16.08 | 0 | 0.006 | 0 | 0 | 0 | 0 | 0 | 0 | 1 | 0 | 0 | 0 | 0 | 0   | 1638 |
| NM_139177 | SLC39A11     | Coding | -0.349 | -0.449 | 152 | -16.08 | 0 | 0.006 | 0 | 0 | 0 | 0 | 0 | 0 | 1 | 0 | 0 | 0 | 0 | 0   | 1638 |
| NM_016001 | UTP18        | Coding | -0.348 | -0.463 | 141 | -13.23 | 0 | 0.006 | 0 | 0 | 0 | 0 | 0 | 0 | 1 | 0 | 0 | 0 | 0 | 0   | 164  |
| NM_016540 | GPR83        | Coding | -0.348 | -0.429 | 155 | -16.04 | 0 | 0.006 | 0 | 0 | 0 | 0 | 0 | 0 | 1 | 0 | 0 | 0 | 0 | 0   | 2838 |
| NM_014252 | SLC25A15     | Coding | -0.348 | -0.348 | 158 | -22.44 | 0 | 0.006 | 0 | 0 | 0 | 0 | 0 | 0 | 1 | 0 | 0 | 0 | 0 | 0   | 2793 |
| NM_001242 | LOC389831    | Coding | -0.347 | -0.427 | 156 | -17.56 | 0 | 0.006 | 0 | 0 | 0 | 0 | 0 | 0 | 1 | 0 | 0 | 0 | 0 | 0   | 1786 |
| NM_001322 | LOC102724951 | Coding | -0.347 | -0.427 | 156 | -17.56 | 0 | 0.006 | 0 | 0 | 0 | 0 | 0 | 0 | 1 | 0 | 0 | 0 | 0 | 0   | 1786 |
| NM_001322 | LOC102724219 | Coding | -0.347 | -0.427 | 156 | -17.56 | 0 | 0.006 | 0 | 0 | 0 | 0 | 0 | 0 | 1 | 0 | 0 | 0 | 0 | 0   | 1786 |
| NM_001322 | LOC102724843 | Coding | -0.347 | -0.427 | 156 | -17.56 | 0 | 0.006 | 0 | 0 | 0 | 0 | 0 | 0 | 1 | 0 | 0 | 0 | 0 | 0   | 1786 |
| NM_000599 | IGFBP5       | Coding | -0.344 | -0.45  | 146 | -16.06 | 0 | 0.006 | 0 | 0 | 0 | 0 | 0 | 0 | 1 | 0 | 0 | 0 | 0 | 0   | 4646 |
| NM_001143 | COP2         | Coding | -0.343 | -0.448 | 157 | -17.1  | 0 | 0.006 | 0 | 0 | 0 | 0 | 0 | 0 | 1 | 0 | 0 | 0 | 0 | 0   | 2676 |
| NM_004236 | COP2         | Coding | -0.343 | -0.448 | 157 | -17.1  | 0 | 0.006 | 0 | 0 | 0 | 0 | 0 | 0 | 1 | 0 | 0 | 0 | 0 | 0   | 2676 |
| NM_152890 | COL24A1      | Coding | -0.342 | -0.475 | 145 | -13.45 | 0 | 0.006 | 0 | 0 | 0 | 0 | 0 | 0 | 1 | 0 | 0 | 0 | 0 | 0   | 1313 |
| NM_002173 | IFNA16       | Coding | -0.34  | -0.434 | 147 | -12.56 | 0 | 0.006 | 0 | 0 | 0 | 0 | 0 | 0 | 1 | 0 | 0 | 0 | 0 | 0   | 363  |

|           |          |        |        |        |     |        |   |       |   |   |   |   |   |   |   |   |   |   |   |      |
|-----------|----------|--------|--------|--------|-----|--------|---|-------|---|---|---|---|---|---|---|---|---|---|---|------|
| NM_001304 | PTPN23   | Coding | -0.34  | -0.348 | 149 | -17.35 | 0 | 0.006 | 0 | 0 | 0 | 0 | 0 | 0 | 1 | 0 | 0 | 0 | 0 | 256  |
| NM_015466 | PTPN23   | Coding | -0.34  | -0.348 | 149 | -17.35 | 0 | 0.006 | 0 | 0 | 0 | 0 | 0 | 0 | 1 | 0 | 0 | 0 | 0 | 256  |
| NM_014805 | EPM2AIP1 | Coding | -0.339 | -0.458 | 148 | -15.74 | 0 | 0.006 | 0 | 0 | 0 | 0 | 0 | 0 | 1 | 0 | 0 | 0 | 0 | 5388 |
| NM_030625 | TET1     | Coding | -0.338 | -0.4   | 156 | -17.86 | 0 | 0.006 | 0 | 0 | 0 | 0 | 0 | 0 | 1 | 0 | 0 | 0 | 0 | 2668 |
| NM_001166 | FHIT     | Coding | -0.338 | -0.373 | 164 | -22.79 | 0 | 0.006 | 0 | 0 | 0 | 0 | 0 | 0 | 1 | 0 | 0 | 0 | 0 | 2296 |
| NM_002172 | IFNA14   | Coding | -0.336 | -0.428 | 147 | -13.26 | 0 | 0.006 | 0 | 0 | 0 | 0 | 0 | 0 | 1 | 0 | 0 | 0 | 0 | 164  |
| NM_001003 | RECQL5   | Coding | -0.336 | -0.418 | 153 | -17.98 | 0 | 0.006 | 0 | 0 | 0 | 0 | 0 | 0 | 1 | 0 | 0 | 0 | 0 | 926  |
| NM_018452 | TMEM242  | Coding | -0.335 | -0.48  | 159 | -19.28 | 0 | 0.006 | 0 | 0 | 0 | 0 | 0 | 0 | 1 | 0 | 0 | 0 | 0 | 3879 |
| NM_001170 | SCUBE2   | Coding | -0.335 | -0.435 | 153 | -17.98 | 0 | 0.006 | 0 | 0 | 0 | 0 | 0 | 0 | 1 | 0 | 0 | 0 | 0 | 1545 |
| NM_020974 | SCUBE2   | Coding | -0.335 | -0.435 | 153 | -17.98 | 0 | 0.006 | 0 | 0 | 0 | 0 | 0 | 0 | 1 | 0 | 0 | 0 | 0 | 1545 |
| NM_002012 | FHIT     | Coding | -0.335 | -0.371 | 164 | -22.79 | 0 | 0.006 | 0 | 0 | 0 | 0 | 0 | 0 | 1 | 0 | 0 | 0 | 0 | 2307 |
| NM_001047 | SRD5A1   | Coding | -0.334 | -0.431 | 144 | -16.49 | 0 | 0.006 | 0 | 0 | 0 | 0 | 0 | 0 | 1 | 0 | 0 | 0 | 0 | 1294 |
| NM_001204 | NPR3     | Coding | -0.333 | -0.397 | 157 | -19.61 | 0 | 0.006 | 0 | 0 | 0 | 0 | 0 | 0 | 1 | 0 | 0 | 0 | 0 | 5379 |
| NM_000908 | NPR3     | Coding | -0.333 | -0.397 | 157 | -19.61 | 0 | 0.006 | 0 | 0 | 0 | 0 | 0 | 0 | 1 | 0 | 0 | 0 | 0 | 5379 |
| NM_001204 | NPR3     | Coding | -0.333 | -0.397 | 157 | -19.61 | 0 | 0.006 | 0 | 0 | 0 | 0 | 0 | 0 | 1 | 0 | 0 | 0 | 0 | 5379 |
| NM_001549 | IFIT3    | Coding | -0.331 | -0.364 | 154 | -20.14 | 0 | 0.006 | 0 | 0 | 0 | 0 | 0 | 0 | 1 | 0 | 0 | 0 | 0 | 840  |
| NM_001031 | IFIT3    | Coding | -0.331 | -0.364 | 154 | -20.14 | 0 | 0.006 | 0 | 0 | 0 | 0 | 0 | 0 | 1 | 0 | 0 | 0 | 0 | 840  |
| NM_001289 | IFIT3    | Coding | -0.331 | -0.364 | 154 | -20.14 | 0 | 0.006 | 0 | 0 | 0 | 0 | 0 | 0 | 1 | 0 | 0 | 0 | 0 | 840  |
| NM_001289 | IFIT3    | Coding | -0.331 | -0.364 | 154 | -20.14 | 0 | 0.006 | 0 | 0 | 0 | 0 | 0 | 0 | 1 | 0 | 0 | 0 | 0 | 840  |
| NM_001289 | IFIT3    | Coding | -0.331 | -0.364 | 154 | -20.14 | 0 | 0.006 | 0 | 0 | 0 | 0 | 0 | 0 | 1 | 0 | 0 | 0 | 0 | 840  |
| NM_153809 | TAF1L    | Coding | -0.33  | -0.421 | 148 | -16.02 | 0 | 0.006 | 0 | 0 | 0 | 0 | 0 | 0 | 1 | 0 | 0 | 0 | 0 | 645  |
| NM_001127 | CACNA1A  | Coding | -0.33  | -0.458 | 149 | -14.42 | 0 | 0.006 | 0 | 0 | 0 | 0 | 0 | 0 | 1 | 0 | 0 | 0 | 0 | 871  |
| NM_023035 | CACNA1A  | Coding | -0.33  | -0.458 | 149 | -14.42 | 0 | 0.006 | 0 | 0 | 0 | 0 | 0 | 0 | 1 | 0 | 0 | 0 | 0 | 871  |
| NM_017523 | XAF1     | Coding | -0.329 | -0.457 | 143 | -13.9  | 0 | 0.006 | 0 | 0 | 0 | 0 | 0 | 0 | 1 | 0 | 0 | 0 | 0 | 2476 |
| NM_199139 | XAF1     | Coding | -0.329 | -0.457 | 143 | -13.9  | 0 | 0.006 | 0 | 0 | 0 | 0 | 0 | 0 | 1 | 0 | 0 | 0 | 0 | 2476 |
| NM_213568 | SLC39A3  | Coding | -0.329 | -0.37  | 156 | -21.94 | 0 | 0.006 | 0 | 0 | 0 | 0 | 0 | 0 | 1 | 0 | 0 | 0 | 0 | 2414 |
| NM_001142 | ARFGAP3  | Coding | -0.329 | -0.453 | 145 | -11.75 | 0 | 0.006 | 0 | 0 | 0 | 0 | 0 | 0 | 1 | 0 | 0 | 0 | 0 | 1062 |
| NM_014570 | ARFGAP3  | Coding | -0.329 | -0.453 | 145 | -11.75 | 0 | 0.006 | 0 | 0 | 0 | 0 | 0 | 0 | 1 | 0 | 0 | 0 | 0 | 1062 |
| NM_001131 | ATG10    | Coding | -0.328 | -0.428 | 153 | -13.99 | 0 | 0.006 | 0 | 0 | 0 | 0 | 0 | 0 | 1 | 0 | 0 | 0 | 0 | 1334 |
| NM_031482 | ATG10    | Coding | -0.328 | -0.428 | 153 | -13.99 | 0 | 0.006 | 0 | 0 | 0 | 0 | 0 | 0 | 1 | 0 | 0 | 0 | 0 | 1334 |
| NM_001252 | PCMT1    | Coding | -0.328 | -0.316 | 156 | -21.69 | 0 | 0.006 | 0 | 0 | 0 | 0 | 0 | 0 | 1 | 0 | 0 | 0 | 0 | 793  |
| NM_001252 | PCMT1    | Coding | -0.328 | -0.316 | 156 | -21.69 | 0 | 0.006 | 0 | 0 | 0 | 0 | 0 | 0 | 1 | 0 | 0 | 0 | 0 | 793  |
| NM_021057 | IFNA7    | Coding | -0.327 | -0.4   | 155 | -18.07 | 0 | 0.006 | 0 | 0 | 0 | 0 | 0 | 0 | 1 | 0 | 0 | 0 | 0 | 127  |
| NM_001143 | ASAP3    | Coding | -0.326 | -0.412 | 146 | -15.13 | 0 | 0.006 | 0 | 0 | 0 | 0 | 0 | 0 | 1 | 0 | 0 | 0 | 0 | 1293 |
| NM_017707 | ASAP3    | Coding | -0.326 | -0.412 | 146 | -15.13 | 0 | 0.006 | 0 | 0 | 0 | 0 | 0 | 0 | 1 | 0 | 0 | 0 | 0 | 1293 |
| NM_152485 | C1orf74  | Coding | -0.326 | -0.431 | 140 | -12.38 | 0 | 0.006 | 0 | 0 | 0 | 0 | 0 | 0 | 1 | 0 | 0 | 0 | 0 | 3617 |
| NM_000068 | CACNA1A  | Coding | -0.325 | -0.455 | 149 | -14.42 | 0 | 0.006 | 0 | 0 | 0 | 0 | 0 | 0 | 1 | 0 | 0 | 0 | 0 | 1604 |
| NM_001127 | CACNA1A  | Coding | -0.325 | -0.455 | 149 | -14.42 | 0 | 0.006 | 0 | 0 | 0 | 0 | 0 | 0 | 1 | 0 | 0 | 0 | 0 | 1604 |
| NM_001174 | CACNA1A  | Coding | -0.325 | -0.455 | 149 | -14.42 | 0 | 0.006 | 0 | 0 | 0 | 0 | 0 | 0 | 1 | 0 | 0 | 0 | 0 | 1604 |
| NM_032862 | TIGD5    | Coding | -0.325 | -0.33  | 154 | -21.33 | 0 | 0.006 | 0 | 0 | 0 | 0 | 0 | 0 | 1 | 0 | 0 | 0 | 0 | 483  |
| NM_001322 | MSI2     | Coding | -0.324 | -0.353 | 158 | -18.03 | 0 | 0.006 | 0 | 0 | 0 | 0 | 0 | 0 | 1 | 0 | 0 | 0 | 0 | 5172 |
| NM_138962 | MSI2     | Coding | -0.324 | -0.353 | 158 | -18.03 | 0 | 0.006 | 0 | 0 | 0 | 0 | 0 | 0 | 1 | 0 | 0 | 0 | 0 | 5172 |
| NM_133334 | WHSC1    | Coding | -0.323 | -0.443 | 145 | -12.89 | 0 | 0.006 | 0 | 0 | 0 | 0 | 0 | 0 | 1 | 0 | 0 | 0 | 0 | 6417 |
| NM_001300 | ZNF570   | Coding | -0.322 | -0.413 | 152 | -14.51 | 0 | 0.006 | 0 | 0 | 0 | 0 | 0 | 0 | 1 | 0 | 0 | 0 | 0 | 3419 |
| NM_001321 | ZNF570   | Coding | -0.322 | -0.413 | 152 | -14.51 | 0 | 0.006 | 0 | 0 | 0 | 0 | 0 | 0 | 1 | 0 | 0 | 0 | 0 | 3419 |
| NM_001321 | ZNF570   | Coding | -0.322 | -0.413 | 152 | -14.51 | 0 | 0.006 | 0 | 0 | 0 | 0 | 0 | 0 | 1 | 0 | 0 | 0 | 0 | 3419 |
| NM_001321 | ZNF570   | Coding | -0.322 | -0.413 | 152 | -14.51 | 0 | 0.006 | 0 | 0 | 0 | 0 | 0 | 0 | 1 | 0 | 0 | 0 | 0 | 3419 |
| NM_144694 | ZNF570   | Coding | -0.322 | -0.413 | 152 | -14.51 | 0 | 0.006 | 0 | 0 | 0 | 0 | 0 | 0 | 1 | 0 | 0 | 0 | 0 | 3419 |
| NM_001321 | ZNF570   | Coding | -0.322 | -0.413 | 152 | -14.51 | 0 | 0.006 | 0 | 0 | 0 | 0 | 0 | 0 | 1 | 0 | 0 | 0 | 0 | 3419 |
| NM_207435 | C12orf76 | Coding | -0.322 | -0.396 | 149 | -17.16 | 0 | 0.006 | 0 | 0 | 0 | 0 | 0 | 0 | 1 | 0 | 0 | 0 | 0 | 1174 |
| NM_014614 | PSME4    | Coding | -0.32  | -0.448 | 152 | -14.48 | 0 | 0.006 | 0 | 0 | 0 | 0 | 0 | 0 | 1 | 0 | 0 | 0 | 0 | 1511 |
| NM_006578 | GNB5     | Coding | -0.32  | -0.415 | 144 | -11.75 | 0 | 0.006 | 0 | 0 | 0 | 0 | 0 | 0 | 1 | 0 | 0 | 0 | 0 | 1831 |
| NM_016194 | GNB5     | Coding | -0.32  | -0.415 | 144 | -11.75 | 0 | 0.006 | 0 | 0 | 0 | 0 | 0 | 0 | 1 | 0 | 0 | 0 | 0 | 1831 |
| NM_022140 | EPB41L4A | Coding | -0.319 | -0.365 | 146 | -15.57 | 0 | 0.006 | 0 | 0 | 0 | 0 | 0 | 0 | 1 | 0 | 0 | 0 | 0 | 2372 |
| NM_145315 | LACE1    | Coding | -0.318 | -0.456 | 140 | -11.75 | 0 | 0.006 | 0 | 0 | 0 | 0 | 0 | 0 | 1 | 0 | 0 | 0 | 0 | 3359 |
| NM_001007 | ZNF182   | Coding | -0.318 | -0.417 | 146 | -13.6  | 0 | 0.006 | 0 | 0 | 0 | 0 | 0 | 0 | 1 | 0 | 0 | 0 | 0 | 1316 |
| NM_006962 | ZNF182   | Coding | -0.318 | -0.417 | 146 | -13.6  | 0 | 0.006 | 0 | 0 | 0 | 0 | 0 | 0 | 1 | 0 | 0 | 0 | 0 | 1316 |
| NM_001178 | ZNF182   | Coding | -0.318 | -0.417 | 146 | -13.6  | 0 | 0.006 | 0 | 0 | 0 | 0 | 0 | 0 | 1 | 0 | 0 | 0 | 0 | 1316 |
| NM_032228 | FAR1     | Coding | -0.316 | -0.418 | 140 | -11.77 | 0 | 0.006 | 0 | 0 | 0 | 0 | 0 | 0 | 1 | 0 | 0 | 0 | 0 | 3572 |
| NM_001252 | PCMT1    | Coding | -0.315 | -0.307 | 156 | -21.69 | 0 | 0.006 | 0 | 0 | 0 | 0 | 0 | 0 | 1 | 0 | 0 | 0 | 0 | 843  |
| NM_001252 | PCMT1    | Coding | -0.315 | -0.307 | 156 | -21.69 | 0 | 0.006 | 0 | 0 | 0 | 0 | 0 | 0 | 1 | 0 | 0 | 0 | 0 | 843  |

|           |          |        |        |        |     |        |   |       |   |   |   |   |   |   |   |   |   |   |   |      |
|-----------|----------|--------|--------|--------|-----|--------|---|-------|---|---|---|---|---|---|---|---|---|---|---|------|
| NM_005389 | PCMT1    | Coding | -0.315 | -0.307 | 156 | -21.69 | 0 | 0.006 | 0 | 0 | 0 | 0 | 0 | 0 | 1 | 0 | 0 | 0 | 0 | 843  |
| NM_003454 | ZNF200   | Coding | -0.315 | -0.42  | 140 | -14.08 | 0 | 0.006 | 0 | 0 | 0 | 0 | 0 | 0 | 1 | 0 | 0 | 0 | 0 | 1567 |
| NM_001145 | ZNF200   | Coding | -0.315 | -0.42  | 140 | -14.08 | 0 | 0.006 | 0 | 0 | 0 | 0 | 0 | 0 | 1 | 0 | 0 | 0 | 0 | 1567 |
| NM_198088 | ZNF200   | Coding | -0.315 | -0.42  | 140 | -14.08 | 0 | 0.006 | 0 | 0 | 0 | 0 | 0 | 0 | 1 | 0 | 0 | 0 | 0 | 1567 |
| NM_001145 | ZNF200   | Coding | -0.315 | -0.42  | 140 | -14.08 | 0 | 0.006 | 0 | 0 | 0 | 0 | 0 | 0 | 1 | 0 | 0 | 0 | 0 | 1567 |
| NM_198087 | ZNF200   | Coding | -0.315 | -0.42  | 140 | -14.08 | 0 | 0.006 | 0 | 0 | 0 | 0 | 0 | 0 | 1 | 0 | 0 | 0 | 0 | 1567 |
| NM_001145 | ZNF200   | Coding | -0.315 | -0.42  | 140 | -14.08 | 0 | 0.006 | 0 | 0 | 0 | 0 | 0 | 0 | 1 | 0 | 0 | 0 | 0 | 1567 |
| NM_207372 | SH2D4B   | Coding | -0.314 | -0.372 | 150 | -17.1  | 0 | 0.006 | 0 | 0 | 0 | 0 | 0 | 0 | 1 | 0 | 0 | 0 | 0 | 2479 |
| NM_001145 | SH2D4B   | Coding | -0.314 | -0.372 | 150 | -17.1  | 0 | 0.006 | 0 | 0 | 0 | 0 | 0 | 0 | 1 | 0 | 0 | 0 | 0 | 2479 |
| NM_015407 | ABHD14A  | Coding | -0.313 | -0.393 | 146 | -15.34 | 0 | 0.006 | 0 | 0 | 0 | 0 | 0 | 0 | 1 | 0 | 0 | 0 | 0 | 182  |
| NM_001103 | GIGYF2   | Coding | -0.313 | -0.324 | 143 | -14.66 | 0 | 0.006 | 0 | 0 | 0 | 0 | 0 | 0 | 1 | 0 | 0 | 0 | 0 | 3719 |
| NM_001103 | GIGYF2   | Coding | -0.313 | -0.324 | 143 | -14.66 | 0 | 0.006 | 0 | 0 | 0 | 0 | 0 | 0 | 1 | 0 | 0 | 0 | 0 | 3719 |
| NM_001103 | GIGYF2   | Coding | -0.313 | -0.324 | 143 | -14.66 | 0 | 0.006 | 0 | 0 | 0 | 0 | 0 | 0 | 1 | 0 | 0 | 0 | 0 | 3719 |
| NM_015575 | GIGYF2   | Coding | -0.313 | -0.324 | 143 | -14.66 | 0 | 0.006 | 0 | 0 | 0 | 0 | 0 | 0 | 1 | 0 | 0 | 0 | 0 | 3719 |
| NM_001145 | MEIOC    | Coding | -0.312 | -0.391 | 145 | -13.27 | 0 | 0.006 | 0 | 0 | 0 | 0 | 0 | 0 | 1 | 0 | 0 | 0 | 0 | 1601 |
| NM_001256 | PDLIM5   | Coding | -0.31  | -0.428 | 162 | -19.45 | 0 | 0.006 | 0 | 0 | 0 | 0 | 0 | 0 | 1 | 0 | 0 | 0 | 0 | 631  |
| NM_174977 | SEC14L4  | Coding | -0.31  | -0.376 | 147 | -14.13 | 0 | 0.006 | 0 | 0 | 0 | 0 | 0 | 0 | 1 | 0 | 0 | 0 | 0 | 1196 |
| NM_001872 | CPB2     | Coding | -0.308 | -0.37  | 145 | -13.85 | 0 | 0.006 | 0 | 0 | 0 | 0 | 0 | 0 | 1 | 0 | 0 | 0 | 0 | 427  |
| NM_001278 | CPB2     | Coding | -0.308 | -0.37  | 145 | -13.85 | 0 | 0.006 | 0 | 0 | 0 | 0 | 0 | 0 | 1 | 0 | 0 | 0 | 0 | 427  |
| NM_144628 | TBC1D20  | Coding | -0.308 | -0.364 | 154 | -16.67 | 0 | 0.006 | 0 | 0 | 0 | 0 | 0 | 0 | 1 | 0 | 0 | 0 | 0 | 3109 |
| NM_001159 | ZNF583   | Coding | -0.308 | -0.398 | 140 | -13.71 | 0 | 0.006 | 0 | 0 | 0 | 0 | 0 | 0 | 1 | 0 | 0 | 0 | 0 | 663  |
| NM_152478 | ZNF583   | Coding | -0.308 | -0.398 | 140 | -13.71 | 0 | 0.006 | 0 | 0 | 0 | 0 | 0 | 0 | 1 | 0 | 0 | 0 | 0 | 663  |
| NM_001159 | ZNF583   | Coding | -0.308 | -0.398 | 140 | -13.71 | 0 | 0.006 | 0 | 0 | 0 | 0 | 0 | 0 | 1 | 0 | 0 | 0 | 0 | 663  |
| NM_001690 | ATP6V1A  | Coding | -0.306 | -0.388 | 148 | -13.3  | 0 | 0.006 | 0 | 0 | 0 | 0 | 0 | 0 | 1 | 0 | 0 | 0 | 0 | 2631 |
| NM_001145 | CCDC110  | Coding | -0.304 | -0.401 | 140 | -13.02 | 0 | 0.006 | 0 | 0 | 0 | 0 | 0 | 0 | 1 | 0 | 0 | 0 | 0 | 318  |
| NM_152775 | CCDC110  | Coding | -0.304 | -0.401 | 140 | -13.02 | 0 | 0.006 | 0 | 0 | 0 | 0 | 0 | 0 | 1 | 0 | 0 | 0 | 0 | 318  |
| NM_018268 | WDR41    | Coding | -0.304 | -0.365 | 158 | -17.39 | 0 | 0.006 | 0 | 0 | 0 | 0 | 0 | 0 | 1 | 0 | 0 | 0 | 0 | 2202 |
| NM_001300 | RASGEF1B | Coding | -0.302 | -0.338 | 165 | -21.42 | 0 | 0.006 | 0 | 0 | 0 | 0 | 0 | 0 | 1 | 0 | 0 | 0 | 0 | 1375 |
| NM_001300 | RASGEF1B | Coding | -0.302 | -0.338 | 165 | -21.42 | 0 | 0.006 | 0 | 0 | 0 | 0 | 0 | 0 | 1 | 0 | 0 | 0 | 0 | 1375 |
| NM_152545 | RASGEF1B | Coding | -0.302 | -0.338 | 165 | -21.42 | 0 | 0.006 | 0 | 0 | 0 | 0 | 0 | 0 | 1 | 0 | 0 | 0 | 0 | 1375 |
| NM_001005 | NUMB     | Coding | -0.302 | -0.361 | 150 | -15.62 | 0 | 0.006 | 0 | 0 | 0 | 0 | 0 | 0 | 1 | 0 | 0 | 0 | 0 | 1368 |
| NM_001005 | NUMB     | Coding | -0.302 | -0.361 | 150 | -15.62 | 0 | 0.006 | 0 | 0 | 0 | 0 | 0 | 0 | 1 | 0 | 0 | 0 | 0 | 1368 |
| NM_001005 | NUMB     | Coding | -0.302 | -0.361 | 150 | -15.62 | 0 | 0.006 | 0 | 0 | 0 | 0 | 0 | 0 | 1 | 0 | 0 | 0 | 0 | 1368 |
| NM_001320 | NUMB     | Coding | -0.302 | -0.361 | 150 | -15.62 | 0 | 0.006 | 0 | 0 | 0 | 0 | 0 | 0 | 1 | 0 | 0 | 0 | 0 | 1368 |
| NM_003744 | NUMB     | Coding | -0.302 | -0.361 | 150 | -15.62 | 0 | 0.006 | 0 | 0 | 0 | 0 | 0 | 0 | 1 | 0 | 0 | 0 | 0 | 1368 |
| NM_145238 | ZSCAN20  | Coding | -0.301 | -0.419 | 148 | -12.56 | 0 | 0.006 | 0 | 0 | 0 | 0 | 0 | 0 | 1 | 0 | 0 | 0 | 0 | 919  |
| NM_000168 | GLI3     | Coding | -0.301 | -0.359 | 141 | -12.29 | 0 | 0.006 | 0 | 0 | 0 | 0 | 0 | 0 | 1 | 0 | 0 | 0 | 0 | 3380 |
| NM_001008 | STK16    | Coding | -0.301 | -0.335 | 142 | -17.69 | 0 | 0.006 | 0 | 0 | 0 | 0 | 0 | 0 | 1 | 0 | 0 | 0 | 0 | 1778 |
| NM_080723 | NRSN1    | Coding | -0.3   | -0.393 | 150 | -15.67 | 0 | 0.006 | 0 | 0 | 0 | 0 | 0 | 0 | 1 | 0 | 0 | 0 | 0 | 1583 |
| NM_007198 | PROSC    | Coding | -0.299 | -0.44  | 150 | -13.34 | 0 | 0.006 | 0 | 0 | 0 | 0 | 0 | 0 | 1 | 0 | 0 | 0 | 0 | 1664 |
| NM_030788 | DCSTAMP  | Coding | -0.299 | -0.367 | 149 | -16.06 | 0 | 0.006 | 0 | 0 | 0 | 0 | 0 | 0 | 1 | 0 | 0 | 0 | 0 | 491  |
| NM_198541 | IGFL1    | Coding | -0.298 | -0.387 | 144 | -13.06 | 0 | 0.006 | 0 | 0 | 0 | 0 | 0 | 0 | 1 | 0 | 0 | 0 | 0 | 413  |
| NM_139032 | MAPK7    | Coding | -0.298 | -0.3   | 158 | -22.53 | 0 | 0.006 | 0 | 0 | 0 | 0 | 0 | 0 | 1 | 0 | 0 | 0 | 0 | 313  |
| NM_139033 | MAPK7    | Coding | -0.298 | -0.3   | 158 | -22.53 | 0 | 0.006 | 0 | 0 | 0 | 0 | 0 | 0 | 1 | 0 | 0 | 0 | 0 | 313  |
| NM_002749 | MAPK7    | Coding | -0.298 | -0.3   | 158 | -22.53 | 0 | 0.006 | 0 | 0 | 0 | 0 | 0 | 0 | 1 | 0 | 0 | 0 | 0 | 313  |
| NM_139034 | MAPK7    | Coding | -0.298 | -0.3   | 158 | -22.53 | 0 | 0.006 | 0 | 0 | 0 | 0 | 0 | 0 | 1 | 0 | 0 | 0 | 0 | 313  |
| NM_001165 | BIRC3    | Coding | -0.297 | -0.388 | 146 | -12.08 | 0 | 0.006 | 0 | 0 | 0 | 0 | 0 | 0 | 1 | 0 | 0 | 0 | 0 | 2302 |
| NM_182962 | BIRC3    | Coding | -0.297 | -0.388 | 146 | -12.08 | 0 | 0.006 | 0 | 0 | 0 | 0 | 0 | 0 | 1 | 0 | 0 | 0 | 0 | 2302 |
| NM_001010 | TECRL    | Coding | -0.296 | -0.413 | 145 | -14.4  | 0 | 0.006 | 0 | 0 | 0 | 0 | 0 | 0 | 1 | 0 | 0 | 0 | 0 | 1613 |
| NM_006930 | SKP1     | Coding | -0.295 | -0.354 | 152 | -18.64 | 0 | 0.006 | 0 | 0 | 0 | 0 | 0 | 0 | 1 | 0 | 0 | 0 | 0 | 2037 |
| NM_170679 | SKP1     | Coding | -0.295 | -0.354 | 152 | -18.64 | 0 | 0.006 | 0 | 0 | 0 | 0 | 0 | 0 | 1 | 0 | 0 | 0 | 0 | 1342 |
| NM_001171 | MCF2     | Coding | -0.295 | -0.373 | 146 | -15.04 | 0 | 0.006 | 0 | 0 | 0 | 0 | 0 | 0 | 1 | 0 | 0 | 0 | 0 | 672  |
| NM_001171 | MCF2     | Coding | -0.295 | -0.373 | 146 | -15.04 | 0 | 0.006 | 0 | 0 | 0 | 0 | 0 | 0 | 1 | 0 | 0 | 0 | 0 | 672  |
| NM_018036 | ATG2B    | Coding | -0.295 | -0.333 | 160 | -19.82 | 0 | 0.006 | 0 | 0 | 0 | 0 | 0 | 0 | 1 | 0 | 0 | 0 | 0 | 4497 |
| NM_001256 | SSBP2    | Coding | -0.295 | -0.331 | 146 | -14.59 | 0 | 0.006 | 0 | 0 | 0 | 0 | 0 | 0 | 1 | 0 | 0 | 0 | 0 | 3144 |
| NM_001256 | SSBP2    | Coding | -0.295 | -0.331 | 146 | -14.59 | 0 | 0.006 | 0 | 0 | 0 | 0 | 0 | 0 | 1 | 0 | 0 | 0 | 0 | 3144 |
| NM_001256 | SSBP2    | Coding | -0.295 | -0.331 | 146 | -14.59 | 0 | 0.006 | 0 | 0 | 0 | 0 | 0 | 0 | 1 | 0 | 0 | 0 | 0 | 3144 |
| NM_001256 | SSBP2    | Coding | -0.295 | -0.331 | 146 | -14.59 | 0 | 0.006 | 0 | 0 | 0 | 0 | 0 | 0 | 1 | 0 | 0 | 0 | 0 | 3144 |
| NM_001256 | SSBP2    | Coding | -0.295 | -0.331 | 146 | -14.59 | 0 | 0.006 | 0 | 0 | 0 | 0 | 0 | 0 | 1 | 0 | 0 | 0 | 0 | 3144 |
| NM_012446 | SSBP2    | Coding | -0.295 | -0.331 | 146 | -14.59 | 0 | 0.006 | 0 | 0 | 0 | 0 | 0 | 0 | 1 | 0 | 0 | 0 | 0 | 3144 |

|           |         |        |        |        |     |        |   |       |   |   |   |   |   |   |   |   |   |   |   |      |
|-----------|---------|--------|--------|--------|-----|--------|---|-------|---|---|---|---|---|---|---|---|---|---|---|------|
| NM_000655 | SELL    | Coding | -0.295 | -0.387 | 146 | -14.22 | 0 | 0.006 | 0 | 0 | 0 | 0 | 0 | 0 | 1 | 0 | 0 | 0 | 0 | 1119 |
| NM_004962 | GDF10   | Coding | -0.294 | -0.394 | 149 | -18.51 | 0 | 0.006 | 0 | 0 | 0 | 0 | 0 | 0 | 1 | 0 | 0 | 0 | 0 | 782  |
| NM_022754 | SFXN1   | Coding | -0.293 | -0.396 | 148 | -16.46 | 0 | 0.006 | 0 | 0 | 0 | 0 | 0 | 0 | 1 | 0 | 0 | 0 | 0 | 3007 |
| NM_004613 | TGM2    | Coding | -0.291 | -0.364 | 152 | -14.79 | 0 | 0.006 | 0 | 0 | 0 | 0 | 0 | 0 | 1 | 0 | 0 | 0 | 0 | 2832 |
| NM_000900 | MGP     | Coding | -0.29  | -0.419 | 146 | -16.45 | 0 | 0.006 | 0 | 0 | 0 | 0 | 0 | 0 | 1 | 0 | 0 | 0 | 0 | 958  |
| NM_001190 | MGP     | Coding | -0.29  | -0.419 | 146 | -16.45 | 0 | 0.006 | 0 | 0 | 0 | 0 | 0 | 0 | 1 | 0 | 0 | 0 | 0 | 958  |
| NM_001190 | CLSPN   | Coding | -0.288 | -0.437 | 147 | -15.01 | 0 | 0.006 | 0 | 0 | 0 | 0 | 0 | 0 | 1 | 0 | 0 | 0 | 0 | 4384 |
| NM_022111 | CLSPN   | Coding | -0.288 | -0.437 | 147 | -15.01 | 0 | 0.006 | 0 | 0 | 0 | 0 | 0 | 0 | 1 | 0 | 0 | 0 | 0 | 4384 |
| NM_001314 | ZNF526  | Coding | -0.288 | -0.364 | 152 | -20.31 | 0 | 0.006 | 0 | 0 | 0 | 0 | 0 | 0 | 1 | 0 | 0 | 0 | 0 | 637  |
| NM_133444 | ZNF526  | Coding | -0.288 | -0.364 | 152 | -20.31 | 0 | 0.006 | 0 | 0 | 0 | 0 | 0 | 0 | 1 | 0 | 0 | 0 | 0 | 637  |
| NM_001171 | MCF2    | Coding | -0.288 | -0.368 | 146 | -15.04 | 0 | 0.006 | 0 | 0 | 0 | 0 | 0 | 0 | 1 | 0 | 0 | 0 | 0 | 700  |
| NM_005369 | MCF2    | Coding | -0.288 | -0.368 | 146 | -15.04 | 0 | 0.006 | 0 | 0 | 0 | 0 | 0 | 0 | 1 | 0 | 0 | 0 | 0 | 700  |
| NM_001099 | MCF2    | Coding | -0.288 | -0.368 | 146 | -15.04 | 0 | 0.006 | 0 | 0 | 0 | 0 | 0 | 0 | 1 | 0 | 0 | 0 | 0 | 700  |
| NM_001171 | MCF2    | Coding | -0.288 | -0.368 | 146 | -15.04 | 0 | 0.006 | 0 | 0 | 0 | 0 | 0 | 0 | 1 | 0 | 0 | 0 | 0 | 700  |
| NM_001318 | BEND6   | Coding | -0.288 | -0.297 | 159 | -19.6  | 0 | 0.006 | 0 | 0 | 0 | 0 | 0 | 0 | 1 | 0 | 0 | 0 | 0 | 2743 |
| NM_001142 | DHRS9   | Coding | -0.287 | -0.356 | 146 | -12.13 | 0 | 0.11  | 0 | 0 | 0 | 0 | 0 | 0 | 0 | 1 | 0 | 0 | 0 | 400  |
| NM_001289 | DHRS9   | Coding | -0.287 | -0.356 | 146 | -12.13 | 0 | 0.11  | 0 | 0 | 0 | 0 | 0 | 0 | 0 | 1 | 0 | 0 | 0 | 400  |
| NM_001142 | DHRS9   | Coding | -0.287 | -0.356 | 146 | -12.13 | 0 | 0.11  | 0 | 0 | 0 | 0 | 0 | 0 | 0 | 1 | 0 | 0 | 0 | 400  |
| NM_199204 | DHRS9   | Coding | -0.287 | -0.356 | 146 | -12.13 | 0 | 0.11  | 0 | 0 | 0 | 0 | 0 | 0 | 0 | 1 | 0 | 0 | 0 | 400  |
| NM_001146 | MOGS    | Coding | -0.287 | -0.363 | 146 | -14.1  | 0 | 0.006 | 0 | 0 | 0 | 0 | 0 | 0 | 1 | 0 | 0 | 0 | 0 | 218  |
| NM_006302 | MOGS    | Coding | -0.287 | -0.363 | 146 | -14.1  | 0 | 0.006 | 0 | 0 | 0 | 0 | 0 | 0 | 1 | 0 | 0 | 0 | 0 | 218  |
| NM_001312 | COX20   | Coding | -0.286 | -0.357 | 145 | -10.47 | 0 | 0.11  | 0 | 0 | 0 | 0 | 0 | 0 | 0 | 1 | 0 | 0 | 0 | 1887 |
| NM_198076 | COX20   | Coding | -0.286 | -0.357 | 145 | -10.47 | 0 | 0.11  | 0 | 0 | 0 | 0 | 0 | 0 | 0 | 1 | 0 | 0 | 0 | 1887 |
| NM_001312 | COX20   | Coding | -0.286 | -0.357 | 145 | -10.47 | 0 | 0.11  | 0 | 0 | 0 | 0 | 0 | 0 | 0 | 1 | 0 | 0 | 0 | 1887 |
| NM_001312 | COX20   | Coding | -0.286 | -0.357 | 145 | -10.47 | 0 | 0.11  | 0 | 0 | 0 | 0 | 0 | 0 | 0 | 1 | 0 | 0 | 0 | 1887 |
| NM_001312 | COX20   | Coding | -0.286 | -0.357 | 145 | -10.47 | 0 | 0.11  | 0 | 0 | 0 | 0 | 0 | 0 | 0 | 1 | 0 | 0 | 0 | 2054 |
| NM_001320 | HTR2B   | Coding | -0.286 | -0.361 | 141 | -9.62  | 0 | 0.11  | 0 | 0 | 0 | 0 | 0 | 0 | 0 | 1 | 0 | 0 | 0 | 284  |
| NM_000867 | HTR2B   | Coding | -0.286 | -0.361 | 141 | -9.62  | 0 | 0.11  | 0 | 0 | 0 | 0 | 0 | 0 | 0 | 1 | 0 | 0 | 0 | 281  |
| NM_001257 | DCSTAMP | Coding | -0.286 | -0.358 | 149 | -16.06 | 0 | 0.006 | 0 | 0 | 0 | 0 | 0 | 0 | 1 | 0 | 0 | 0 | 0 | 541  |
| NM_001270 | ANKRD46 | Coding | -0.285 | -0.337 | 159 | -15.02 | 0 | 0.006 | 0 | 0 | 0 | 0 | 0 | 0 | 1 | 0 | 0 | 0 | 0 | 825  |
| NM_003188 | MAP3K7  | Coding | -0.285 | -0.413 | 146 | -12.44 | 0 | 0.006 | 0 | 0 | 0 | 0 | 0 | 0 | 1 | 0 | 0 | 0 | 0 | 2928 |
| NM_145331 | MAP3K7  | Coding | -0.285 | -0.413 | 146 | -12.44 | 0 | 0.006 | 0 | 0 | 0 | 0 | 0 | 0 | 1 | 0 | 0 | 0 | 0 | 2928 |
| NM_019859 | HTR7    | Coding | -0.285 | -0.333 | 144 | -15.26 | 0 | 0.006 | 0 | 0 | 0 | 0 | 0 | 0 | 1 | 0 | 0 | 0 | 0 | 1663 |
| NM_015691 | WWC3    | Coding | -0.285 | -0.368 | 153 | -15.54 | 0 | 0.11  | 0 | 0 | 0 | 0 | 0 | 0 | 0 | 1 | 0 | 0 | 0 | 2977 |
| NM_000872 | HTR7    | Coding | -0.284 | -0.332 | 144 | -15.26 | 0 | 0.006 | 0 | 0 | 0 | 0 | 0 | 0 | 1 | 0 | 0 | 0 | 0 | 1667 |
| NM_001184 | PSG1    | Coding | -0.282 | -0.337 | 146 | -18.68 | 0 | 0.006 | 0 | 0 | 0 | 0 | 0 | 0 | 1 | 0 | 0 | 0 | 0 | 673  |
| NM_001184 | PSG1    | Coding | -0.282 | -0.337 | 146 | -18.68 | 0 | 0.006 | 0 | 0 | 0 | 0 | 0 | 0 | 1 | 0 | 0 | 0 | 0 | 593  |
| NM_001185 | AZGP1   | Coding | -0.281 | -0.364 | 140 | -11.75 | 0 | 0.006 | 0 | 0 | 0 | 0 | 0 | 0 | 1 | 0 | 0 | 0 | 0 | 276  |
| NM_001308 | CCDC58  | Coding | -0.281 | -0.345 | 146 | -14.38 | 0 | 0.006 | 0 | 0 | 0 | 0 | 0 | 0 | 1 | 0 | 0 | 0 | 0 | 278  |
| NM_001017 | CCDC58  | Coding | -0.281 | -0.345 | 146 | -14.38 | 0 | 0.006 | 0 | 0 | 0 | 0 | 0 | 0 | 1 | 0 | 0 | 0 | 0 | 278  |
| NM_001243 | CCDC40  | Coding | -0.281 | -0.312 | 149 | -22.54 | 0 | 0.006 | 0 | 0 | 0 | 0 | 0 | 0 | 1 | 0 | 0 | 0 | 0 | 422  |
| NM_001037 | USP14   | Coding | -0.281 | -0.338 | 146 | -14.91 | 0 | 0.006 | 0 | 0 | 0 | 0 | 0 | 0 | 1 | 0 | 0 | 0 | 0 | 2455 |
| NM_005151 | USP14   | Coding | -0.281 | -0.338 | 146 | -14.91 | 0 | 0.006 | 0 | 0 | 0 | 0 | 0 | 0 | 1 | 0 | 0 | 0 | 0 | 2455 |
| NM_000869 | HTR3A   | Coding | -0.281 | -0.351 | 153 | -15.95 | 0 | 0.006 | 0 | 0 | 0 | 0 | 0 | 0 | 1 | 0 | 0 | 0 | 0 | 549  |
| NM_213621 | HTR3A   | Coding | -0.281 | -0.351 | 153 | -15.95 | 0 | 0.006 | 0 | 0 | 0 | 0 | 0 | 0 | 1 | 0 | 0 | 0 | 0 | 549  |
| NM_001161 | HTR3A   | Coding | -0.281 | -0.351 | 153 | -15.95 | 0 | 0.006 | 0 | 0 | 0 | 0 | 0 | 0 | 1 | 0 | 0 | 0 | 0 | 549  |
| NM_001307 | UPRT    | Coding | -0.281 | -0.391 | 145 | -13.83 | 0 | 0.006 | 0 | 0 | 0 | 0 | 0 | 0 | 1 | 0 | 0 | 0 | 0 | 1520 |
| NM_145052 | UPRT    | Coding | -0.281 | -0.391 | 145 | -13.83 | 0 | 0.006 | 0 | 0 | 0 | 0 | 0 | 0 | 1 | 0 | 0 | 0 | 0 | 1386 |
| NM_001012 | DUXA    | Coding | -0.281 | -0.412 | 161 | -17.72 | 0 | 0.006 | 0 | 0 | 0 | 0 | 0 | 0 | 1 | 0 | 0 | 0 | 0 | 2686 |
| NM_015513 | CRELD1  | Coding | -0.28  | -0.394 | 150 | -14.23 | 0 | 0.006 | 0 | 0 | 0 | 0 | 0 | 0 | 1 | 0 | 0 | 0 | 0 | 834  |
| NM_001031 | CRELD1  | Coding | -0.28  | -0.394 | 150 | -14.23 | 0 | 0.006 | 0 | 0 | 0 | 0 | 0 | 0 | 1 | 0 | 0 | 0 | 0 | 1022 |
| NM_001077 | CRELD1  | Coding | -0.28  | -0.394 | 150 | -14.23 | 0 | 0.006 | 0 | 0 | 0 | 0 | 0 | 0 | 1 | 0 | 0 | 0 | 0 | 834  |
| NM_001184 | MITF    | Coding | -0.28  | -0.368 | 159 | -21.21 | 0 | 0.006 | 0 | 0 | 0 | 0 | 0 | 0 | 1 | 0 | 0 | 0 | 0 | 699  |
| NM_001242 | RIN2    | Coding | -0.279 | -0.368 | 146 | -15.82 | 0 | 0.006 | 0 | 0 | 0 | 0 | 0 | 0 | 1 | 0 | 0 | 0 | 0 | 1523 |
| NM_018993 | RIN2    | Coding | -0.279 | -0.368 | 146 | -15.82 | 0 | 0.006 | 0 | 0 | 0 | 0 | 0 | 0 | 1 | 0 | 0 | 0 | 0 | 1523 |
| NM_004170 | SLC1A1  | Coding | -0.279 | -0.341 | 141 | -15.29 | 0 | 0.006 | 0 | 0 | 0 | 0 | 0 | 0 | 1 | 0 | 0 | 0 | 0 | 1911 |
| NM_007375 | TARDBP  | Coding | -0.278 | -0.377 | 154 | -21.28 | 0 | 0.006 | 0 | 0 | 0 | 0 | 0 | 0 | 1 | 0 | 0 | 0 | 0 | 2838 |
| NM_001130 | PSG8    | Coding | -0.278 | -0.331 | 146 | -18.68 | 0 | 0.006 | 0 | 0 | 0 | 0 | 0 | 0 | 1 | 0 | 0 | 0 | 0 | 673  |
| NM_001130 | PSG8    | Coding | -0.278 | -0.331 | 146 | -18.68 | 0 | 0.006 | 0 | 0 | 0 | 0 | 0 | 0 | 1 | 0 | 0 | 0 | 0 | 673  |
| NM_182548 | LHFPL5  | Coding | -0.278 | -0.346 | 145 | -10.47 | 0 | 0.11  | 0 | 0 | 0 | 0 | 0 | 0 | 0 | 1 | 0 | 0 | 0 | 1110 |

|           |           |        |        |        |     |        |   |       |   |   |   |   |   |   |   |   |   |   |   |      |
|-----------|-----------|--------|--------|--------|-----|--------|---|-------|---|---|---|---|---|---|---|---|---|---|---|------|
| NM_023012 | RSRC2     | Coding | -0.277 | -0.391 | 160 | -18.93 | 0 | 0.11  | 0 | 0 | 0 | 0 | 0 | 0 | 1 | 0 | 0 | 0 | 0 | 884  |
| NM_001276 | PSG4      | Coding | -0.277 | -0.329 | 146 | -18.68 | 0 | 0.006 | 0 | 0 | 0 | 0 | 0 | 0 | 1 | 0 | 0 | 0 | 0 | 670  |
| NM_001316 | PSG4      | Coding | -0.277 | -0.329 | 146 | -18.68 | 0 | 0.006 | 0 | 0 | 0 | 0 | 0 | 0 | 1 | 0 | 0 | 0 | 0 | 670  |
| NM_002780 | PSG4      | Coding | -0.277 | -0.329 | 146 | -18.68 | 0 | 0.006 | 0 | 0 | 0 | 0 | 0 | 0 | 1 | 0 | 0 | 0 | 0 | 670  |
| NM_213633 | PSG4      | Coding | -0.277 | -0.329 | 146 | -18.68 | 0 | 0.006 | 0 | 0 | 0 | 0 | 0 | 0 | 1 | 0 | 0 | 0 | 0 | 670  |
| NM_001278 | POLDIP3   | Coding | -0.277 | -0.36  | 161 | -16.78 | 0 | 0.006 | 0 | 0 | 0 | 0 | 0 | 0 | 1 | 0 | 0 | 0 | 0 | 2070 |
| NM_178136 | POLDIP3   | Coding | -0.277 | -0.36  | 161 | -16.78 | 0 | 0.006 | 0 | 0 | 0 | 0 | 0 | 0 | 1 | 0 | 0 | 0 | 0 | 2070 |
| NM_032311 | POLDIP3   | Coding | -0.277 | -0.36  | 161 | -16.78 | 0 | 0.006 | 0 | 0 | 0 | 0 | 0 | 0 | 1 | 0 | 0 | 0 | 0 | 2070 |
| NM_004500 | HNRNPC    | Coding | -0.276 | -0.335 | 141 | -9.57  | 0 | 0.11  | 0 | 0 | 0 | 0 | 0 | 0 | 0 | 1 | 0 | 0 | 0 | 2086 |
| NM_001077 | HNRNPC    | Coding | -0.276 | -0.335 | 141 | -9.57  | 0 | 0.11  | 0 | 0 | 0 | 0 | 0 | 0 | 0 | 1 | 0 | 0 | 0 | 2086 |
| NM_031314 | HNRNPC    | Coding | -0.276 | -0.335 | 141 | -9.57  | 0 | 0.11  | 0 | 0 | 0 | 0 | 0 | 0 | 0 | 1 | 0 | 0 | 0 | 2086 |
| NM_001077 | HNRNPC    | Coding | -0.276 | -0.335 | 141 | -9.57  | 0 | 0.11  | 0 | 0 | 0 | 0 | 0 | 0 | 0 | 1 | 0 | 0 | 0 | 2086 |
| NM_003341 | UBE2E1    | Coding | -0.276 | -0.394 | 150 | -15.06 | 0 | 0.006 | 0 | 0 | 0 | 0 | 0 | 0 | 1 | 0 | 0 | 0 | 0 | 1034 |
| NM_182666 | UBE2E1    | Coding | -0.276 | -0.394 | 150 | -15.06 | 0 | 0.006 | 0 | 0 | 0 | 0 | 0 | 0 | 1 | 0 | 0 | 0 | 0 | 1034 |
| NM_001202 | UBE2E1    | Coding | -0.276 | -0.394 | 150 | -15.06 | 0 | 0.006 | 0 | 0 | 0 | 0 | 0 | 0 | 1 | 0 | 0 | 0 | 0 | 1034 |
| NM_153183 | NUDT10    | Coding | -0.275 | -0.343 | 153 | -13.32 | 0 | 0.11  | 0 | 0 | 0 | 0 | 0 | 0 | 0 | 1 | 0 | 0 | 0 | 1286 |
| NM_001304 | NUDT10    | Coding | -0.275 | -0.343 | 153 | -13.32 | 0 | 0.11  | 0 | 0 | 0 | 0 | 0 | 0 | 0 | 1 | 0 | 0 | 0 | 1286 |
| NM_021795 | ELK4      | Coding | -0.275 | -0.366 | 148 | -16    | 0 | 0.006 | 0 | 0 | 0 | 0 | 0 | 0 | 1 | 0 | 0 | 0 | 0 | 560  |
| NM_032279 | ATP13A4   | Coding | -0.275 | -0.339 | 154 | -17.35 | 0 | 0.006 | 0 | 0 | 0 | 0 | 0 | 0 | 1 | 0 | 0 | 0 | 0 | 3685 |
| NM_001206 | PSG7      | Coding | -0.275 | -0.325 | 146 | -18.68 | 0 | 0.006 | 0 | 0 | 0 | 0 | 0 | 0 | 1 | 0 | 0 | 0 | 0 | 676  |
| NM_001290 | PSG7      | Coding | -0.275 | -0.325 | 146 | -18.68 | 0 | 0.006 | 0 | 0 | 0 | 0 | 0 | 0 | 1 | 0 | 0 | 0 | 0 | 676  |
| NM_002783 | PSG7      | Coding | -0.275 | -0.325 | 146 | -18.68 | 0 | 0.006 | 0 | 0 | 0 | 0 | 0 | 0 | 1 | 0 | 0 | 0 | 0 | 676  |
| NM_001278 | PHYKPL    | Coding | -0.274 | -0.346 | 140 | -13.56 | 0 | 0.006 | 0 | 0 | 0 | 0 | 0 | 0 | 1 | 0 | 0 | 0 | 0 | 473  |
| NM_153373 | PHYKPL    | Coding | -0.274 | -0.346 | 140 | -13.56 | 0 | 0.006 | 0 | 0 | 0 | 0 | 0 | 0 | 1 | 0 | 0 | 0 | 0 | 473  |
| NM_001301 | VSTM2A    | Coding | -0.274 | -0.376 | 140 | -13.9  | 0 | 0.006 | 0 | 0 | 0 | 0 | 0 | 0 | 1 | 0 | 0 | 0 | 0 | 1861 |
| NM_001195 | ANKRD28   | Coding | -0.273 | -0.359 | 140 | -12.51 | 0 | 0.006 | 0 | 0 | 0 | 0 | 0 | 0 | 1 | 0 | 0 | 0 | 0 | 3033 |
| NM_001195 | ANKRD28   | Coding | -0.273 | -0.359 | 140 | -12.51 | 0 | 0.006 | 0 | 0 | 0 | 0 | 0 | 0 | 1 | 0 | 0 | 0 | 0 | 3033 |
| NM_015199 | ANKRD28   | Coding | -0.273 | -0.359 | 140 | -12.51 | 0 | 0.006 | 0 | 0 | 0 | 0 | 0 | 0 | 1 | 0 | 0 | 0 | 0 | 3033 |
| NM_018696 | ELAC1     | Coding | -0.273 | -0.354 | 146 | -12.73 | 0 | 0.006 | 0 | 0 | 0 | 0 | 0 | 0 | 1 | 0 | 0 | 0 | 0 | 1035 |
| NM_033379 | CDK1      | Coding | -0.273 | -0.397 | 140 | -17    | 0 | 0.006 | 0 | 0 | 0 | 0 | 0 | 0 | 1 | 0 | 0 | 0 | 0 | 877  |
| NM_001786 | CDK1      | Coding | -0.273 | -0.397 | 140 | -17    | 0 | 0.006 | 0 | 0 | 0 | 0 | 0 | 0 | 1 | 0 | 0 | 0 | 0 | 877  |
| NM_001320 | CDK1      | Coding | -0.273 | -0.397 | 140 | -17    | 0 | 0.006 | 0 | 0 | 0 | 0 | 0 | 0 | 1 | 0 | 0 | 0 | 0 | 878  |
| NM_019860 | HTR7      | Coding | -0.273 | -0.324 | 144 | -15.26 | 0 | 0.006 | 0 | 0 | 0 | 0 | 0 | 0 | 1 | 0 | 0 | 0 | 0 | 1711 |
| NM_001311 | TNFAIP8L3 | Coding | -0.273 | -0.311 | 157 | -21.08 | 0 | 0.006 | 0 | 0 | 0 | 0 | 0 | 0 | 1 | 0 | 0 | 0 | 0 | 1279 |
| NM_207381 | TNFAIP8L3 | Coding | -0.273 | -0.311 | 157 | -21.08 | 0 | 0.006 | 0 | 0 | 0 | 0 | 0 | 0 | 1 | 0 | 0 | 0 | 0 | 1279 |
| NM_015509 | NECAP1    | Coding | -0.272 | -0.413 | 140 | -11.75 | 0 | 0.006 | 0 | 0 | 0 | 0 | 0 | 0 | 1 | 0 | 0 | 0 | 0 | 1687 |
| NM_001482 | GATM      | Coding | -0.272 | -0.394 | 145 | -11.39 | 0 | 0.006 | 0 | 0 | 0 | 0 | 0 | 0 | 1 | 0 | 0 | 0 | 0 | 985  |
| NM_001321 | GATM      | Coding | -0.272 | -0.394 | 145 | -11.39 | 0 | 0.006 | 0 | 0 | 0 | 0 | 0 | 0 | 1 | 0 | 0 | 0 | 0 | 985  |
| NM_018218 | USP40     | Coding | -0.271 | -0.349 | 153 | -20.28 | 0 | 0.006 | 0 | 0 | 0 | 0 | 0 | 0 | 1 | 0 | 0 | 0 | 0 | 1873 |
| NM_021083 | XK        | Coding | -0.271 | -0.405 | 152 | -15.97 | 0 | 0.006 | 0 | 0 | 0 | 0 | 0 | 0 | 1 | 0 | 0 | 0 | 0 | 3668 |
| NM_001308 | IL2RA     | Coding | -0.271 | -0.397 | 145 | -16.75 | 0 | 0.006 | 0 | 0 | 0 | 0 | 0 | 0 | 1 | 0 | 0 | 0 | 0 | 2178 |
| NM_000417 | IL2RA     | Coding | -0.271 | -0.397 | 145 | -16.75 | 0 | 0.006 | 0 | 0 | 0 | 0 | 0 | 0 | 1 | 0 | 0 | 0 | 0 | 2178 |
| NM_001308 | IL2RA     | Coding | -0.271 | -0.397 | 145 | -16.75 | 0 | 0.006 | 0 | 0 | 0 | 0 | 0 | 0 | 1 | 0 | 0 | 0 | 0 | 2178 |
| NM_032511 | FAXC      | Coding | -0.271 | -0.386 | 153 | -12.74 | 0 | 0.006 | 0 | 0 | 0 | 0 | 0 | 0 | 1 | 0 | 0 | 0 | 0 | 8247 |
| NM_018440 | PAG1      | Coding | -0.269 | -0.292 | 165 | -25.97 | 0 | 0.006 | 0 | 0 | 0 | 0 | 0 | 0 | 1 | 0 | 0 | 0 | 0 | 8733 |
| NM_001319 | EIF2A     | Coding | -0.268 | -0.296 | 143 | -14.01 | 0 | 0.006 | 0 | 0 | 0 | 0 | 0 | 0 | 1 | 0 | 0 | 0 | 0 | 2105 |
| NM_001319 | EIF2A     | Coding | -0.268 | -0.296 | 143 | -14.01 | 0 | 0.006 | 0 | 0 | 0 | 0 | 0 | 0 | 1 | 0 | 0 | 0 | 0 | 2105 |
| NM_001319 | EIF2A     | Coding | -0.268 | -0.296 | 143 | -14.01 | 0 | 0.006 | 0 | 0 | 0 | 0 | 0 | 0 | 1 | 0 | 0 | 0 | 0 | 2105 |
| NM_032025 | EIF2A     | Coding | -0.268 | -0.296 | 143 | -14.01 | 0 | 0.006 | 0 | 0 | 0 | 0 | 0 | 0 | 1 | 0 | 0 | 0 | 0 | 2105 |
| NM_001319 | EIF2A     | Coding | -0.268 | -0.296 | 143 | -14.01 | 0 | 0.006 | 0 | 0 | 0 | 0 | 0 | 0 | 1 | 0 | 0 | 0 | 0 | 2105 |
| NM_001257 | LOC339862 | Coding | -0.268 | -0.403 | 153 | -17.17 | 0 | 0.006 | 0 | 0 | 0 | 0 | 0 | 0 | 1 | 0 | 0 | 0 | 0 | 1875 |
| NM_005240 | ETV3      | Coding | -0.268 | -0.353 | 140 | -14.08 | 0 | 0.006 | 0 | 0 | 0 | 0 | 0 | 0 | 1 | 0 | 0 | 0 | 0 | 896  |
| NM_001300 | BATF2     | Coding | -0.267 | -0.373 | 154 | -17.31 | 0 | 0.006 | 0 | 0 | 0 | 0 | 0 | 0 | 1 | 0 | 0 | 0 | 0 | 1184 |
| NM_001300 | BATF2     | Coding | -0.267 | -0.373 | 154 | -17.31 | 0 | 0.006 | 0 | 0 | 0 | 0 | 0 | 0 | 1 | 0 | 0 | 0 | 0 | 1184 |
| NM_138456 | BATF2     | Coding | -0.267 | -0.373 | 154 | -17.31 | 0 | 0.006 | 0 | 0 | 0 | 0 | 0 | 0 | 1 | 0 | 0 | 0 | 0 | 1184 |
| NM_001102 | TTI2      | Coding | -0.267 | -0.299 | 156 | -15.28 | 0 | 0.006 | 0 | 0 | 0 | 0 | 0 | 0 | 1 | 0 | 0 | 0 | 0 | 664  |
| NM_001265 | TTI2      | Coding | -0.267 | -0.299 | 156 | -15.28 | 0 | 0.006 | 0 | 0 | 0 | 0 | 0 | 0 | 1 | 0 | 0 | 0 | 0 | 664  |
| NM_025115 | TTI2      | Coding | -0.267 | -0.299 | 156 | -15.28 | 0 | 0.006 | 0 | 0 | 0 | 0 | 0 | 0 | 1 | 0 | 0 | 0 | 0 | 664  |
| NM_005584 | MAB21L1   | Coding | -0.267 | -0.357 | 142 | -11.88 | 0 | 0.006 | 0 | 0 | 0 | 0 | 0 | 0 | 1 | 0 | 0 | 0 | 0 | 1270 |
| NM_014062 | NOB1      | Coding | -0.267 | -0.293 | 145 | -18.11 | 0 | 0.006 | 0 | 0 | 0 | 0 | 0 | 0 | 1 | 0 | 0 | 0 | 0 | 478  |

|           |          |        |        |        |     |        |   |       |   |   |   |   |   |   |   |   |   |   |   |      |
|-----------|----------|--------|--------|--------|-----|--------|---|-------|---|---|---|---|---|---|---|---|---|---|---|------|
| NM_003226 | TFF3     | Coding | -0.266 | -0.299 | 154 | -16.12 | 0 | 0.006 | 0 | 0 | 0 | 0 | 0 | 0 | 1 | 0 | 0 | 0 | 0 | 589  |
| NM_032693 | NAA11    | Coding | -0.266 | -0.288 | 153 | -19.21 | 0 | 0.006 | 0 | 0 | 0 | 0 | 0 | 0 | 1 | 0 | 0 | 0 | 0 | 686  |
| NM_001130 | ELMOD1   | Coding | -0.266 | -0.363 | 174 | -24.01 | 0 | 0.11  | 0 | 0 | 0 | 0 | 0 | 0 | 0 | 1 | 0 | 0 | 0 | 1582 |
| NM_001308 | ELMOD1   | Coding | -0.266 | -0.363 | 174 | -24.01 | 0 | 0.11  | 0 | 0 | 0 | 0 | 0 | 0 | 0 | 1 | 0 | 0 | 0 | 1582 |
| NM_018712 | ELMOD1   | Coding | -0.266 | -0.363 | 174 | -24.01 | 0 | 0.11  | 0 | 0 | 0 | 0 | 0 | 0 | 0 | 1 | 0 | 0 | 0 | 1582 |
| NM_001135 | ARHGAP26 | Coding | -0.265 | -0.317 | 146 | -15.06 | 0 | 0.006 | 0 | 0 | 0 | 0 | 0 | 0 | 1 | 0 | 0 | 0 | 0 | 6561 |
| NM_015071 | ARHGAP26 | Coding | -0.265 | -0.317 | 146 | -15.06 | 0 | 0.006 | 0 | 0 | 0 | 0 | 0 | 0 | 1 | 0 | 0 | 0 | 0 | 6561 |
| NM_014149 | WDR91    | Coding | -0.265 | -0.357 | 140 | -12.03 | 0 | 0.006 | 0 | 0 | 0 | 0 | 0 | 0 | 1 | 0 | 0 | 0 | 0 | 2313 |
| NM_015933 | TMA7     | Coding | -0.264 | -0.348 | 164 | -21.1  | 0 | 0.11  | 0 | 0 | 0 | 0 | 0 | 0 | 0 | 1 | 0 | 0 | 0 | 247  |
| NM_001018 | SFMBT2   | Coding | -0.264 | -0.401 | 140 | -13.02 | 0 | 0.006 | 0 | 0 | 0 | 0 | 0 | 0 | 1 | 0 | 0 | 0 | 0 | 5146 |
| NM_001029 | SFMBT2   | Coding | -0.264 | -0.401 | 140 | -13.02 | 0 | 0.006 | 0 | 0 | 0 | 0 | 0 | 0 | 1 | 0 | 0 | 0 | 0 | 5146 |
| NM_001128 | DIS3     | Coding | -0.264 | -0.301 | 159 | -22.24 | 0 | 0.006 | 0 | 0 | 0 | 0 | 0 | 0 | 1 | 0 | 0 | 0 | 0 | 4393 |
| NM_014953 | DIS3     | Coding | -0.264 | -0.301 | 159 | -22.24 | 0 | 0.006 | 0 | 0 | 0 | 0 | 0 | 0 | 1 | 0 | 0 | 0 | 0 | 4393 |
| NM_001322 | DIS3     | Coding | -0.264 | -0.301 | 159 | -22.24 | 0 | 0.006 | 0 | 0 | 0 | 0 | 0 | 0 | 1 | 0 | 0 | 0 | 0 | 4393 |
| NM_001322 | DIS3     | Coding | -0.264 | -0.301 | 159 | -22.24 | 0 | 0.006 | 0 | 0 | 0 | 0 | 0 | 0 | 1 | 0 | 0 | 0 | 0 | 4393 |
| NM_138447 | ZNF689   | Coding | -0.263 | -0.328 | 149 | -16.49 | 0 | 0.006 | 0 | 0 | 0 | 0 | 0 | 0 | 1 | 0 | 0 | 0 | 0 | 1706 |
| NM_198992 | SYT10    | Coding | -0.262 | -0.415 | 155 | -18.17 | 0 | 0.006 | 0 | 0 | 0 | 0 | 0 | 0 | 1 | 0 | 0 | 0 | 0 | 1417 |
| NM_173631 | ZNF547   | Coding | -0.262 | -0.349 | 142 | -12.89 | 0 | 0.006 | 0 | 0 | 0 | 0 | 0 | 0 | 1 | 0 | 0 | 0 | 0 | 1372 |
| NM_005986 | SOX1     | Coding | -0.262 | -0.334 | 153 | -19.12 | 0 | 0.006 | 0 | 0 | 0 | 0 | 0 | 0 | 1 | 0 | 0 | 0 | 0 | 2872 |
| NM_024949 | WWC2     | Coding | -0.261 | -0.335 | 157 | -17.14 | 0 | 0.11  | 0 | 0 | 0 | 0 | 0 | 0 | 0 | 1 | 0 | 0 | 0 | 5047 |
| NM_020697 | KCNS2    | Coding | -0.261 | -0.373 | 156 | -17.41 | 0 | 0.006 | 0 | 0 | 0 | 0 | 0 | 0 | 1 | 0 | 0 | 0 | 0 | 1382 |
| NM_001206 | RIC1     | Coding | -0.259 | -0.352 | 161 | -19.74 | 0 | 0.006 | 0 | 0 | 0 | 0 | 0 | 0 | 1 | 0 | 0 | 0 | 0 | 2310 |
| NM_020829 | RIC1     | Coding | -0.259 | -0.352 | 161 | -19.74 | 0 | 0.006 | 0 | 0 | 0 | 0 | 0 | 0 | 1 | 0 | 0 | 0 | 0 | 2310 |
| NM_001730 | KLF5     | Coding | -0.258 | -0.293 | 146 | -15.5  | 0 | 0.006 | 0 | 0 | 0 | 0 | 0 | 0 | 1 | 0 | 0 | 0 | 0 | 1656 |
| NM_001286 | KLF5     | Coding | -0.258 | -0.293 | 146 | -15.5  | 0 | 0.006 | 0 | 0 | 0 | 0 | 0 | 0 | 1 | 0 | 0 | 0 | 0 | 1656 |
| NM_145872 | ASB4     | Coding | -0.257 | -0.288 | 148 | -16.03 | 0 | 0.006 | 0 | 0 | 0 | 0 | 0 | 0 | 1 | 0 | 0 | 0 | 0 | 426  |
| NM_002079 | GOT1     | Coding | -0.256 | -0.335 | 148 | -11.75 | 0 | 0.006 | 0 | 0 | 0 | 0 | 0 | 0 | 1 | 0 | 0 | 0 | 0 | 677  |
| NM_001278 | SLC38A1  | Coding | -0.255 | -0.281 | 157 | -22.24 | 0 | 0.006 | 0 | 0 | 0 | 0 | 0 | 0 | 1 | 0 | 0 | 0 | 0 | 402  |
| NM_001282 | FAM71F1  | Coding | -0.254 | -0.263 | 145 | -15.48 | 0 | 0.006 | 0 | 0 | 0 | 0 | 0 | 0 | 1 | 0 | 0 | 0 | 0 | 630  |
| NM_001282 | FAM71F1  | Coding | -0.254 | -0.263 | 145 | -15.48 | 0 | 0.006 | 0 | 0 | 0 | 0 | 0 | 0 | 1 | 0 | 0 | 0 | 0 | 630  |
| NM_032599 | FAM71F1  | Coding | -0.254 | -0.263 | 145 | -15.48 | 0 | 0.006 | 0 | 0 | 0 | 0 | 0 | 0 | 1 | 0 | 0 | 0 | 0 | 630  |
| NM_001015 | PHF6     | Coding | -0.254 | -0.392 | 146 | -14.44 | 0 | 0.006 | 0 | 0 | 0 | 0 | 0 | 0 | 1 | 0 | 0 | 0 | 0 | 3132 |
| NM_032458 | PHF6     | Coding | -0.254 | -0.392 | 146 | -14.44 | 0 | 0.006 | 0 | 0 | 0 | 0 | 0 | 0 | 1 | 0 | 0 | 0 | 0 | 3462 |
| NM_001319 | CLEC12B  | Coding | -0.254 | -0.338 | 162 | -22.21 | 0 | 0.11  | 0 | 0 | 0 | 0 | 0 | 0 | 0 | 1 | 0 | 0 | 0 | 2203 |
| NM_205852 | CLEC12B  | Coding | -0.254 | -0.338 | 162 | -22.21 | 0 | 0.11  | 0 | 0 | 0 | 0 | 0 | 0 | 0 | 1 | 0 | 0 | 0 | 2203 |
| NM_032656 | DHX37    | Coding | -0.254 | -0.344 | 151 | -16.02 | 0 | 0.006 | 0 | 0 | 0 | 0 | 0 | 0 | 1 | 0 | 0 | 0 | 0 | 978  |
| NM_002076 | GNS      | Coding | -0.254 | -0.297 | 154 | -17.5  | 0 | 0.006 | 0 | 0 | 0 | 0 | 0 | 0 | 1 | 0 | 0 | 0 | 0 | 3299 |
| NM_002486 | NCBP1    | Coding | -0.253 | -0.389 | 144 | -11.79 | 0 | 0.006 | 0 | 0 | 0 | 0 | 0 | 0 | 1 | 0 | 0 | 0 | 0 | 2548 |
| NM_178128 | FADS6    | Coding | -0.252 | -0.289 | 151 | -20.08 | 0 | 0.006 | 0 | 0 | 0 | 0 | 0 | 0 | 1 | 0 | 0 | 0 | 0 | 1018 |
| NM_006273 | CCL7     | Coding | -0.25  | -0.315 | 145 | -13.28 | 0 | 0.006 | 0 | 0 | 0 | 0 | 0 | 0 | 1 | 0 | 0 | 0 | 0 | 440  |
| NM_018260 | ZNF701   | Coding | -0.25  | -0.359 | 140 | -11.75 | 0 | 0.006 | 0 | 0 | 0 | 0 | 0 | 0 | 1 | 0 | 0 | 0 | 0 | 3717 |
| NM_001172 | ZNF701   | Coding | -0.25  | -0.359 | 140 | -11.75 | 0 | 0.006 | 0 | 0 | 0 | 0 | 0 | 0 | 1 | 0 | 0 | 0 | 0 | 3717 |
| NM_017420 | SIX4     | Coding | -0.25  | -0.416 | 140 | -15.27 | 0 | 0.006 | 0 | 0 | 0 | 0 | 0 | 0 | 1 | 0 | 0 | 0 | 0 | 3869 |
| NM_002355 | M6PR     | Coding | -0.25  | -0.233 | 166 | -19.66 | 0 | 0.006 | 0 | 0 | 0 | 0 | 0 | 0 | 1 | 0 | 0 | 0 | 0 | 1457 |
| NM_001207 | M6PR     | Coding | -0.25  | -0.233 | 166 | -19.66 | 0 | 0.006 | 0 | 0 | 0 | 0 | 0 | 0 | 1 | 0 | 0 | 0 | 0 | 1457 |
| NM_001111 | CLDN22   | Coding | -0.25  | -0.301 | 142 | -15.1  | 0 | 0.006 | 0 | 0 | 0 | 0 | 0 | 0 | 1 | 0 | 0 | 0 | 0 | 1489 |
| NM_015986 | CRLF3    | Coding | -0.249 | -0.311 | 146 | -14.24 | 0 | 0.11  | 0 | 0 | 0 | 0 | 0 | 0 | 0 | 1 | 0 | 0 | 0 | 1503 |
| NM_004210 | NEURL1   | Coding | -0.249 | -0.318 | 142 | -16.41 | 0 | 0.006 | 0 | 0 | 0 | 0 | 0 | 0 | 1 | 0 | 0 | 0 | 0 | 2180 |
| NM_000928 | PLA2G1B  | Coding | -0.249 | -0.263 | 156 | -18.24 | 0 | 0.006 | 0 | 0 | 0 | 0 | 0 | 0 | 1 | 0 | 0 | 0 | 0 | 82   |
| NM_017882 | CLN6     | Coding | -0.249 | -0.335 | 144 | -12.75 | 0 | 0.006 | 0 | 0 | 0 | 0 | 0 | 0 | 1 | 0 | 0 | 0 | 0 | 1148 |
| NM_001321 | RAD51B   | Coding | -0.249 | -0.277 | 150 | -15.08 | 0 | 0.006 | 0 | 0 | 0 | 0 | 0 | 0 | 1 | 0 | 0 | 0 | 0 | 1879 |
| NM_000771 | CYP2C9   | Coding | -0.248 | -0.305 | 141 | -13.11 | 0 | 0.006 | 0 | 0 | 0 | 0 | 0 | 0 | 1 | 0 | 0 | 0 | 0 | 363  |
| NM_001143 | RBM24    | Coding | -0.248 | -0.405 | 147 | -14.92 | 0 | 0.006 | 0 | 0 | 0 | 0 | 0 | 0 | 1 | 0 | 0 | 0 | 0 | 1749 |
| NM_001143 | RBM24    | Coding | -0.248 | -0.405 | 147 | -14.92 | 0 | 0.006 | 0 | 0 | 0 | 0 | 0 | 0 | 1 | 0 | 0 | 0 | 0 | 1749 |
| NM_153020 | RBM24    | Coding | -0.248 | -0.405 | 147 | -14.92 | 0 | 0.006 | 0 | 0 | 0 | 0 | 0 | 0 | 1 | 0 | 0 | 0 | 0 | 1749 |
| NM_022748 | TNS3     | Coding | -0.248 | -0.292 | 140 | -10.58 | 0 | 0.11  | 0 | 0 | 0 | 0 | 0 | 0 | 0 | 1 | 0 | 0 | 0 | 2922 |
| NM_001199 | NCOA7    | Coding | -0.248 | -0.31  | 143 | -13.8  | 0 | 0.006 | 0 | 0 | 0 | 0 | 0 | 0 | 1 | 0 | 0 | 0 | 0 | 3259 |
| NM_001199 | NCOA7    | Coding | -0.248 | -0.31  | 143 | -13.8  | 0 | 0.006 | 0 | 0 | 0 | 0 | 0 | 0 | 1 | 0 | 0 | 0 | 0 | 3259 |
| NM_001122 | NCOA7    | Coding | -0.248 | -0.31  | 143 | -13.8  | 0 | 0.006 | 0 | 0 | 0 | 0 | 0 | 0 | 1 | 0 | 0 | 0 | 0 | 3259 |
| NM_001199 | NCOA7    | Coding | -0.248 | -0.31  | 143 | -13.8  | 0 | 0.006 | 0 | 0 | 0 | 0 | 0 | 0 | 1 | 0 | 0 | 0 | 0 | 3259 |

|           |           |        |        |        |     |        |   |       |   |   |   |   |   |   |   |   |   |   |   |      |
|-----------|-----------|--------|--------|--------|-----|--------|---|-------|---|---|---|---|---|---|---|---|---|---|---|------|
| NM_181782 | NCOA7     | Coding | -0.248 | -0.31  | 143 | -13.8  | 0 | 0.006 | 0 | 0 | 0 | 0 | 0 | 0 | 1 | 0 | 0 | 0 | 0 | 3259 |
| NM_001199 | NCOA7     | Coding | -0.248 | -0.31  | 143 | -13.8  | 0 | 0.006 | 0 | 0 | 0 | 0 | 0 | 0 | 1 | 0 | 0 | 0 | 0 | 3259 |
| NM_145332 | MAP3K7    | Coding | -0.248 | -0.387 | 146 | -12.44 | 0 | 0.006 | 0 | 0 | 0 | 0 | 0 | 0 | 1 | 0 | 0 | 0 | 0 | 3076 |
| NM_145333 | MAP3K7    | Coding | -0.248 | -0.387 | 146 | -12.44 | 0 | 0.006 | 0 | 0 | 0 | 0 | 0 | 0 | 1 | 0 | 0 | 0 | 0 | 3076 |
| NM_006626 | ZBTB6     | Coding | -0.248 | -0.325 | 148 | -16.09 | 0 | 0.006 | 0 | 0 | 0 | 0 | 0 | 0 | 1 | 0 | 0 | 0 | 0 | 2742 |
| NM_001201 | NETO2     | Coding | -0.247 | -0.326 | 142 | -10.45 | 0 | 0.11  | 0 | 0 | 0 | 0 | 0 | 0 | 0 | 1 | 0 | 0 | 0 | 1701 |
| NM_018092 | NETO2     | Coding | -0.247 | -0.326 | 142 | -10.45 | 0 | 0.11  | 0 | 0 | 0 | 0 | 0 | 0 | 0 | 1 | 0 | 0 | 0 | 1701 |
| NM_203423 | LOC389199 | Coding | -0.247 | -0.213 | 152 | -22.93 | 0 | 0.006 | 0 | 0 | 0 | 0 | 0 | 0 | 1 | 0 | 0 | 0 | 0 | 315  |
| NM_198057 | TSC22D3   | Coding | -0.246 | -0.298 | 147 | -15.77 | 0 | 0.006 | 0 | 0 | 0 | 0 | 0 | 0 | 1 | 0 | 0 | 0 | 0 | 1297 |
| NM_001318 | TSC22D3   | Coding | -0.246 | -0.298 | 147 | -15.77 | 0 | 0.006 | 0 | 0 | 0 | 0 | 0 | 0 | 1 | 0 | 0 | 0 | 0 | 1297 |
| NM_001318 | TSC22D3   | Coding | -0.246 | -0.298 | 147 | -15.77 | 0 | 0.006 | 0 | 0 | 0 | 0 | 0 | 0 | 1 | 0 | 0 | 0 | 0 | 1297 |
| NM_004089 | TSC22D3   | Coding | -0.246 | -0.298 | 147 | -15.77 | 0 | 0.006 | 0 | 0 | 0 | 0 | 0 | 0 | 1 | 0 | 0 | 0 | 0 | 1297 |
| NM_001015 | TSC22D3   | Coding | -0.246 | -0.298 | 147 | -15.77 | 0 | 0.006 | 0 | 0 | 0 | 0 | 0 | 0 | 1 | 0 | 0 | 0 | 0 | 1297 |
| NM_001085 | BTLA      | Coding | -0.246 | -0.321 | 161 | -16.3  | 0 | 0.11  | 0 | 0 | 0 | 0 | 0 | 0 | 0 | 1 | 0 | 0 | 0 | 2142 |
| NM_181780 | BTLA      | Coding | -0.246 | -0.321 | 161 | -16.3  | 0 | 0.11  | 0 | 0 | 0 | 0 | 0 | 0 | 0 | 1 | 0 | 0 | 0 | 2142 |
| NM_001278 | NFXL1     | Coding | -0.246 | -0.312 | 147 | -12.61 | 0 | 0.11  | 0 | 0 | 0 | 0 | 0 | 0 | 0 | 1 | 0 | 0 | 0 | 930  |
| NM_152995 | NFXL1     | Coding | -0.246 | -0.312 | 147 | -12.61 | 0 | 0.11  | 0 | 0 | 0 | 0 | 0 | 0 | 0 | 1 | 0 | 0 | 0 | 930  |
| NM_001278 | NFXL1     | Coding | -0.246 | -0.312 | 147 | -12.61 | 0 | 0.11  | 0 | 0 | 0 | 0 | 0 | 0 | 0 | 1 | 0 | 0 | 0 | 930  |
| NM_004857 | AKAP5     | Coding | -0.246 | -0.307 | 143 | -11.51 | 0 | 0.11  | 0 | 0 | 0 | 0 | 0 | 0 | 0 | 1 | 0 | 0 | 0 | 4825 |
| NM_001145 | TCP10L2   | Coding | -0.246 | -0.253 | 165 | -20.86 | 0 | 0.006 | 0 | 0 | 0 | 0 | 0 | 0 | 1 | 0 | 0 | 0 | 0 | 992  |
| NM_080721 | OCSTAMP   | Coding | -0.245 | -0.239 | 150 | -21.34 | 0 | 0.006 | 0 | 0 | 0 | 0 | 0 | 0 | 1 | 0 | 0 | 0 | 0 | 243  |
| NM_001032 | STXBP1    | Coding | -0.245 | -0.313 | 146 | -9.96  | 0 | 0.11  | 0 | 0 | 0 | 0 | 0 | 0 | 0 | 1 | 0 | 0 | 0 | 1859 |
| NM_003165 | STXBP1    | Coding | -0.245 | -0.313 | 146 | -9.96  | 0 | 0.11  | 0 | 0 | 0 | 0 | 0 | 0 | 0 | 1 | 0 | 0 | 0 | 1958 |
| NM_001242 | ENO4      | Coding | -0.245 | -0.37  | 146 | -18.09 | 0 | 0.006 | 0 | 0 | 0 | 0 | 0 | 0 | 1 | 0 | 0 | 0 | 0 | 932  |
| NM_005420 | SULT1E1   | Coding | -0.245 | -0.303 | 143 | -12.02 | 0 | 0.11  | 0 | 0 | 0 | 0 | 0 | 0 | 0 | 1 | 0 | 0 | 0 | 782  |
| NM_004798 | KIF3B     | Coding | -0.244 | -0.295 | 148 | -11.75 | 0 | 0.11  | 0 | 0 | 0 | 0 | 0 | 0 | 0 | 1 | 0 | 0 | 0 | 3689 |
| NM_018683 | RNF114    | Coding | -0.244 | -0.336 | 140 | -14.44 | 0 | 0.006 | 0 | 0 | 0 | 0 | 0 | 0 | 1 | 0 | 0 | 0 | 0 | 1744 |
| NM_001271 | RGS7BP    | Coding | -0.244 | -0.278 | 163 | -22.85 | 0 | 0.006 | 0 | 0 | 0 | 0 | 0 | 0 | 1 | 0 | 0 | 0 | 0 | 3130 |
| NM_001199 | BRD2      | Coding | -0.244 | -0.24  | 167 | -17.5  | 0 | 0.006 | 0 | 0 | 0 | 0 | 0 | 0 | 1 | 0 | 0 | 0 | 0 | 787  |
| NM_001199 | BRD2      | Coding | -0.244 | -0.24  | 167 | -17.5  | 0 | 0.006 | 0 | 0 | 0 | 0 | 0 | 0 | 1 | 0 | 0 | 0 | 0 | 787  |
| NM_005104 | BRD2      | Coding | -0.244 | -0.24  | 167 | -17.5  | 0 | 0.006 | 0 | 0 | 0 | 0 | 0 | 0 | 1 | 0 | 0 | 0 | 0 | 787  |
| NM_001291 | BRD2      | Coding | -0.244 | -0.24  | 167 | -17.5  | 0 | 0.006 | 0 | 0 | 0 | 0 | 0 | 0 | 1 | 0 | 0 | 0 | 0 | 787  |
| NM_001113 | BRD2      | Coding | -0.244 | -0.24  | 167 | -17.5  | 0 | 0.006 | 0 | 0 | 0 | 0 | 0 | 0 | 1 | 0 | 0 | 0 | 0 | 787  |
| NM_004738 | VAPB      | Coding | -0.243 | -0.419 | 158 | -15.67 | 0 | 0.006 | 0 | 0 | 0 | 0 | 0 | 0 | 1 | 0 | 0 | 0 | 0 | 6865 |
| NM_001287 | ZWILCH    | Coding | -0.243 | -0.398 | 145 | -14.47 | 0 | 0.006 | 0 | 0 | 0 | 0 | 0 | 0 | 1 | 0 | 0 | 0 | 0 | 1160 |
| NM_001287 | ZWILCH    | Coding | -0.243 | -0.398 | 145 | -14.47 | 0 | 0.006 | 0 | 0 | 0 | 0 | 0 | 0 | 1 | 0 | 0 | 0 | 0 | 1160 |
| NM_001287 | ZWILCH    | Coding | -0.243 | -0.398 | 145 | -14.47 | 0 | 0.006 | 0 | 0 | 0 | 0 | 0 | 0 | 1 | 0 | 0 | 0 | 0 | 1160 |
| NM_017975 | ZWILCH    | Coding | -0.243 | -0.398 | 145 | -14.47 | 0 | 0.006 | 0 | 0 | 0 | 0 | 0 | 0 | 1 | 0 | 0 | 0 | 0 | 1160 |
| NM_001300 | C1orf162  | Coding | -0.243 | -0.282 | 143 | -11.9  | 0 | 0.006 | 0 | 0 | 0 | 0 | 0 | 0 | 1 | 0 | 0 | 0 | 0 | 389  |
| NM_001300 | C1orf162  | Coding | -0.243 | -0.282 | 143 | -11.9  | 0 | 0.006 | 0 | 0 | 0 | 0 | 0 | 0 | 1 | 0 | 0 | 0 | 0 | 389  |
| NM_174896 | C1orf162  | Coding | -0.243 | -0.282 | 143 | -11.9  | 0 | 0.006 | 0 | 0 | 0 | 0 | 0 | 0 | 1 | 0 | 0 | 0 | 0 | 389  |
| NM_014616 | ATP11B    | Coding | -0.241 | -0.321 | 154 | -15.94 | 0 | 0.11  | 0 | 0 | 0 | 0 | 0 | 0 | 0 | 1 | 0 | 0 | 0 | 3529 |
| NM_001099 | PSMB11    | Coding | -0.24  | -0.329 | 151 | -13.34 | 0 | 0.006 | 0 | 0 | 0 | 0 | 0 | 0 | 1 | 0 | 0 | 0 | 0 | 932  |
| NM_182546 | VSTM2A    | Coding | -0.24  | -0.353 | 140 | -13.9  | 0 | 0.006 | 0 | 0 | 0 | 0 | 0 | 0 | 1 | 0 | 0 | 0 | 0 | 1995 |
| NM_004882 | CIR1      | Coding | -0.24  | -0.295 | 154 | -11.16 | 0 | 0.11  | 0 | 0 | 0 | 0 | 0 | 0 | 0 | 1 | 0 | 0 | 0 | 347  |
| NM_020873 | LRRN1     | Coding | -0.239 | -0.287 | 147 | -12.76 | 0 | 0.11  | 0 | 0 | 0 | 0 | 0 | 0 | 0 | 1 | 0 | 0 | 0 | 3042 |
| NM_177995 | PTPDC1    | Coding | -0.238 | -0.303 | 147 | -14.67 | 0 | 0.006 | 0 | 0 | 0 | 0 | 0 | 0 | 1 | 0 | 0 | 0 | 0 | 1912 |
| NM_001253 | PTPDC1    | Coding | -0.238 | -0.303 | 147 | -14.67 | 0 | 0.006 | 0 | 0 | 0 | 0 | 0 | 0 | 1 | 0 | 0 | 0 | 0 | 1912 |
| NM_001253 | PTPDC1    | Coding | -0.238 | -0.303 | 147 | -14.67 | 0 | 0.006 | 0 | 0 | 0 | 0 | 0 | 0 | 1 | 0 | 0 | 0 | 0 | 1912 |
| NM_152422 | PTPDC1    | Coding | -0.238 | -0.303 | 147 | -14.67 | 0 | 0.006 | 0 | 0 | 0 | 0 | 0 | 0 | 1 | 0 | 0 | 0 | 0 | 1912 |
| NM_017507 | ZNF823    | Coding | -0.238 | -0.309 | 152 | -16.71 | 0 | 0.11  | 0 | 0 | 0 | 0 | 0 | 0 | 0 | 1 | 0 | 0 | 0 | 436  |
| NM_001080 | ZNF823    | Coding | -0.238 | -0.309 | 152 | -16.71 | 0 | 0.11  | 0 | 0 | 0 | 0 | 0 | 0 | 0 | 1 | 0 | 0 | 0 | 436  |
| NM_001297 | ZNF823    | Coding | -0.238 | -0.309 | 152 | -16.71 | 0 | 0.11  | 0 | 0 | 0 | 0 | 0 | 0 | 0 | 1 | 0 | 0 | 0 | 436  |
| NM_001321 | ZFP82     | Coding | -0.238 | -0.354 | 158 | -19.6  | 0 | 0.006 | 0 | 0 | 0 | 0 | 0 | 0 | 1 | 0 | 0 | 0 | 0 | 4111 |
| NM_133466 | ZFP82     | Coding | -0.238 | -0.354 | 158 | -19.6  | 0 | 0.006 | 0 | 0 | 0 | 0 | 0 | 0 | 1 | 0 | 0 | 0 | 0 | 4111 |
| NM_001537 | HSBP1     | Coding | -0.237 | -0.316 | 152 | -13.15 | 0 | 0.006 | 0 | 0 | 0 | 0 | 0 | 0 | 1 | 0 | 0 | 0 | 0 | 1584 |
| NM_177925 | H2AFJ     | Coding | -0.237 | -0.326 | 153 | -15.57 | 0 | 0.11  | 0 | 0 | 0 | 0 | 0 | 0 | 0 | 1 | 0 | 0 | 0 | 3142 |
| NM_000415 | IAPP      | Coding | -0.237 | -0.315 | 159 | -20.41 | 0 | 0.11  | 0 | 0 | 0 | 0 | 0 | 0 | 0 | 1 | 0 | 0 | 0 | 1554 |
| NM_178129 | P2RY8     | Coding | -0.236 | -0.313 | 147 | -18.55 | 0 | 0.11  | 0 | 0 | 0 | 0 | 0 | 0 | 0 | 1 | 0 | 0 | 0 | 2906 |
| NM_005044 | PRKX      | Coding | -0.236 | -0.4   | 140 | -11.75 | 0 | 0.006 | 0 | 0 | 0 | 0 | 0 | 0 | 1 | 0 | 0 | 0 | 0 | 4626 |

|           |         |        |        |        |     |        |   |       |   |   |   |   |   |   |   |   |   |   |   |      |
|-----------|---------|--------|--------|--------|-----|--------|---|-------|---|---|---|---|---|---|---|---|---|---|---|------|
| NM_021238 | FAM60A  | Coding | -0.236 | -0.313 | 149 | -14.57 | 0 | 0.11  | 0 | 0 | 0 | 0 | 0 | 0 | 1 | 0 | 0 | 0 | 0 | 2126 |
| NM_001135 | FAM60A  | Coding | -0.236 | -0.313 | 149 | -14.57 | 0 | 0.11  | 0 | 0 | 0 | 0 | 0 | 0 | 1 | 0 | 0 | 0 | 0 | 2126 |
| NM_001135 | FAM60A  | Coding | -0.236 | -0.313 | 149 | -14.57 | 0 | 0.11  | 0 | 0 | 0 | 0 | 0 | 0 | 1 | 0 | 0 | 0 | 0 | 2126 |
| NM_001308 | STARD4  | Coding | -0.236 | -0.293 | 145 | -10.98 | 0 | 0.11  | 0 | 0 | 0 | 0 | 0 | 0 | 1 | 0 | 0 | 0 | 0 | 3852 |
| NM_001308 | STARD4  | Coding | -0.236 | -0.293 | 145 | -10.98 | 0 | 0.11  | 0 | 0 | 0 | 0 | 0 | 0 | 1 | 0 | 0 | 0 | 0 | 3852 |
| NM_001308 | STARD4  | Coding | -0.236 | -0.293 | 145 | -10.98 | 0 | 0.11  | 0 | 0 | 0 | 0 | 0 | 0 | 1 | 0 | 0 | 0 | 0 | 3852 |
| NM_001308 | STARD4  | Coding | -0.236 | -0.293 | 145 | -10.98 | 0 | 0.11  | 0 | 0 | 0 | 0 | 0 | 0 | 1 | 0 | 0 | 0 | 0 | 3852 |
| NM_139164 | STARD4  | Coding | -0.236 | -0.293 | 145 | -10.98 | 0 | 0.11  | 0 | 0 | 0 | 0 | 0 | 0 | 1 | 0 | 0 | 0 | 0 | 3852 |
| NM_001164 | ASPH    | Coding | -0.235 | -0.28  | 166 | -22.82 | 0 | 0.006 | 0 | 0 | 0 | 0 | 0 | 0 | 1 | 0 | 0 | 0 | 0 | 2803 |
| NM_004318 | ASPH    | Coding | -0.235 | -0.28  | 166 | -22.82 | 0 | 0.006 | 0 | 0 | 0 | 0 | 0 | 0 | 1 | 0 | 0 | 0 | 0 | 2803 |
| NM_000893 | KNG1    | Coding | -0.234 | -0.283 | 140 | -9.57  | 0 | 0.11  | 0 | 0 | 0 | 0 | 0 | 0 | 1 | 0 | 0 | 0 | 0 | 625  |
| NM_001166 | KNG1    | Coding | -0.234 | -0.283 | 140 | -9.57  | 0 | 0.11  | 0 | 0 | 0 | 0 | 0 | 0 | 1 | 0 | 0 | 0 | 0 | 625  |
| NM_014639 | TTC37   | Coding | -0.234 | -0.31  | 165 | -16.73 | 0 | 0.11  | 0 | 0 | 0 | 0 | 0 | 0 | 1 | 0 | 0 | 0 | 0 | 712  |
| NM_001142 | DMTF1   | Coding | -0.234 | -0.288 | 145 | -12.7  | 0 | 0.006 | 0 | 0 | 0 | 0 | 0 | 0 | 1 | 0 | 0 | 0 | 0 | 1192 |
| NM_001142 | DMTF1   | Coding | -0.234 | -0.288 | 145 | -12.7  | 0 | 0.006 | 0 | 0 | 0 | 0 | 0 | 0 | 1 | 0 | 0 | 0 | 0 | 1192 |
| NM_021145 | DMTF1   | Coding | -0.234 | -0.288 | 145 | -12.7  | 0 | 0.006 | 0 | 0 | 0 | 0 | 0 | 0 | 1 | 0 | 0 | 0 | 0 | 1192 |
| NM_182832 | PLAC4   | Coding | -0.234 | -0.316 | 140 | -12.34 | 0 | 0.006 | 0 | 0 | 0 | 0 | 0 | 0 | 1 | 0 | 0 | 0 | 0 | 3945 |
| NM_016094 | COMMD2  | Coding | -0.233 | -0.286 | 146 | -10.52 | 0 | 0.11  | 0 | 0 | 0 | 0 | 0 | 0 | 1 | 0 | 0 | 0 | 0 | 3051 |
| NM_079834 | SCAMP4  | Coding | -0.233 | -0.268 | 153 | -16.81 | 0 | 0.006 | 0 | 0 | 0 | 0 | 0 | 0 | 1 | 0 | 0 | 0 | 0 | 1729 |
| NM_181727 | SPATA12 | Coding | -0.232 | -0.321 | 158 | -15.86 | 0 | 0.11  | 0 | 0 | 0 | 0 | 0 | 0 | 0 | 1 | 0 | 0 | 0 | 1165 |
| NM_173799 | TIGIT   | Coding | -0.232 | -0.286 | 152 | -21.57 | 0 | 0.006 | 0 | 0 | 0 | 0 | 0 | 0 | 1 | 0 | 0 | 0 | 0 | 2157 |
| NM_001316 | ITGA6   | Coding | -0.232 | -0.343 | 143 | -13.67 | 0 | 0.006 | 0 | 0 | 0 | 0 | 0 | 0 | 1 | 0 | 0 | 0 | 0 | 2387 |
| NM_000210 | ITGA6   | Coding | -0.232 | -0.343 | 143 | -13.67 | 0 | 0.006 | 0 | 0 | 0 | 0 | 0 | 0 | 1 | 0 | 0 | 0 | 0 | 2387 |
| NM_001079 | ITGA6   | Coding | -0.232 | -0.343 | 143 | -13.67 | 0 | 0.006 | 0 | 0 | 0 | 0 | 0 | 0 | 1 | 0 | 0 | 0 | 0 | 2203 |
| NM_152280 | SYT11   | Coding | -0.231 | -0.303 | 146 | -16.55 | 0 | 0.006 | 0 | 0 | 0 | 0 | 0 | 0 | 1 | 0 | 0 | 0 | 0 | 3691 |
| NM_001143 | HRH4    | Coding | -0.229 | -0.313 | 152 | -16.86 | 0 | 0.11  | 0 | 0 | 0 | 0 | 0 | 0 | 0 | 1 | 0 | 0 | 0 | 2395 |
| NM_021624 | HRH4    | Coding | -0.229 | -0.313 | 152 | -16.86 | 0 | 0.11  | 0 | 0 | 0 | 0 | 0 | 0 | 0 | 1 | 0 | 0 | 0 | 2395 |
| NM_004979 | KCND1   | Coding | -0.229 | -0.273 | 150 | -18.91 | 0 | 0.006 | 0 | 0 | 0 | 0 | 0 | 0 | 1 | 0 | 0 | 0 | 0 | 1203 |
| NM_024331 | TTPAL   | Coding | -0.229 | -0.323 | 150 | -20.14 | 0 | 0.006 | 0 | 0 | 0 | 0 | 0 | 0 | 1 | 0 | 0 | 0 | 0 | 5062 |
| NM_001261 | TTPAL   | Coding | -0.229 | -0.323 | 150 | -20.14 | 0 | 0.006 | 0 | 0 | 0 | 0 | 0 | 0 | 1 | 0 | 0 | 0 | 0 | 5062 |
| NM_001039 | TTPAL   | Coding | -0.229 | -0.323 | 150 | -20.14 | 0 | 0.006 | 0 | 0 | 0 | 0 | 0 | 0 | 1 | 0 | 0 | 0 | 0 | 5062 |
| NM_005898 | CAPRIN1 | Coding | -0.228 | -0.415 | 140 | -11.75 | 0 | 0.006 | 0 | 0 | 0 | 0 | 0 | 0 | 1 | 0 | 0 | 0 | 0 | 3243 |
| NM_001303 | MORC2   | Coding | -0.228 | -0.271 | 151 | -17.4  | 0 | 0.006 | 0 | 0 | 0 | 0 | 0 | 0 | 1 | 0 | 0 | 0 | 0 | 1673 |
| NM_001303 | MORC2   | Coding | -0.228 | -0.271 | 151 | -17.4  | 0 | 0.006 | 0 | 0 | 0 | 0 | 0 | 0 | 1 | 0 | 0 | 0 | 0 | 1673 |
| NM_014941 | MORC2   | Coding | -0.228 | -0.271 | 151 | -17.4  | 0 | 0.006 | 0 | 0 | 0 | 0 | 0 | 0 | 1 | 0 | 0 | 0 | 0 | 1673 |
| NM_001135 | MAPK9   | Coding | -0.227 | -0.277 | 154 | -15.89 | 0 | 0.006 | 0 | 0 | 0 | 0 | 0 | 0 | 1 | 0 | 0 | 0 | 0 | 1370 |
| NM_000868 | HTR2C   | Coding | -0.226 | -0.293 | 149 | -15.13 | 0 | 0.006 | 0 | 0 | 0 | 0 | 0 | 0 | 1 | 0 | 0 | 0 | 0 | 2646 |
| NM_001256 | HTR2C   | Coding | -0.226 | -0.293 | 149 | -15.13 | 0 | 0.006 | 0 | 0 | 0 | 0 | 0 | 0 | 1 | 0 | 0 | 0 | 0 | 2646 |
| NM_004854 | CHST10  | Coding | -0.226 | -0.331 | 146 | -13.29 | 0 | 0.006 | 0 | 0 | 0 | 0 | 0 | 0 | 1 | 0 | 0 | 0 | 0 | 1385 |
| NM_052848 | CDCC97  | Coding | -0.226 | -0.238 | 147 | -17.51 | 0 | 0.006 | 0 | 0 | 0 | 0 | 0 | 0 | 1 | 0 | 0 | 0 | 0 | 2168 |
| NM_001755 | CBFB    | Coding | -0.226 | -0.275 | 145 | -11.58 | 0 | 0.11  | 0 | 0 | 0 | 0 | 0 | 0 | 0 | 1 | 0 | 0 | 0 | 2323 |
| NM_022845 | CBFB    | Coding | -0.226 | -0.275 | 145 | -11.58 | 0 | 0.11  | 0 | 0 | 0 | 0 | 0 | 0 | 0 | 1 | 0 | 0 | 0 | 2277 |
| NM_001286 | GOT2    | Coding | -0.226 | -0.215 | 153 | -17.86 | 0 | 0.006 | 0 | 0 | 0 | 0 | 0 | 0 | 1 | 0 | 0 | 0 | 0 | 1040 |
| NM_002080 | GOT2    | Coding | -0.226 | -0.215 | 153 | -17.86 | 0 | 0.006 | 0 | 0 | 0 | 0 | 0 | 0 | 1 | 0 | 0 | 0 | 0 | 1040 |
| NM_001277 | CHKA    | Coding | -0.226 | -0.289 | 154 | -18.93 | 0 | 0.11  | 0 | 0 | 0 | 0 | 0 | 0 | 0 | 1 | 0 | 0 | 0 | 1129 |
| NM_212469 | CHKA    | Coding | -0.226 | -0.289 | 154 | -18.93 | 0 | 0.11  | 0 | 0 | 0 | 0 | 0 | 0 | 0 | 1 | 0 | 0 | 0 | 1129 |
| NM_001318 | TLR2    | Coding | -0.225 | -0.311 | 145 | -10.47 | 0 | 0.11  | 0 | 0 | 0 | 0 | 0 | 0 | 0 | 1 | 0 | 0 | 0 | 998  |
| NM_001318 | TLR2    | Coding | -0.225 | -0.311 | 145 | -10.47 | 0 | 0.11  | 0 | 0 | 0 | 0 | 0 | 0 | 0 | 1 | 0 | 0 | 0 | 998  |
| NM_001318 | TLR2    | Coding | -0.225 | -0.311 | 145 | -10.47 | 0 | 0.11  | 0 | 0 | 0 | 0 | 0 | 0 | 0 | 1 | 0 | 0 | 0 | 998  |
| NM_001318 | TLR2    | Coding | -0.225 | -0.311 | 145 | -10.47 | 0 | 0.11  | 0 | 0 | 0 | 0 | 0 | 0 | 0 | 1 | 0 | 0 | 0 | 998  |
| NM_001318 | TLR2    | Coding | -0.225 | -0.311 | 145 | -10.47 | 0 | 0.11  | 0 | 0 | 0 | 0 | 0 | 0 | 0 | 1 | 0 | 0 | 0 | 998  |
| NM_001318 | TLR2    | Coding | -0.225 | -0.311 | 145 | -10.47 | 0 | 0.11  | 0 | 0 | 0 | 0 | 0 | 0 | 0 | 1 | 0 | 0 | 0 | 998  |
| NM_001318 | TLR2    | Coding | -0.225 | -0.311 | 145 | -10.47 | 0 | 0.11  | 0 | 0 | 0 | 0 | 0 | 0 | 0 | 1 | 0 | 0 | 0 | 998  |
| NM_003264 | TLR2    | Coding | -0.225 | -0.311 | 145 | -10.47 | 0 | 0.11  | 0 | 0 | 0 | 0 | 0 | 0 | 0 | 1 | 0 | 0 | 0 | 998  |
| NM_183044 | RNF6    | Coding | -0.225 | -0.338 | 145 | -13.97 | 0 | 0.006 | 0 | 0 | 0 | 0 | 0 | 0 | 1 | 0 | 0 | 0 | 0 | 1056 |
| NM_005977 | RNF6    | Coding | -0.225 | -0.338 | 145 | -13.97 | 0 | 0.006 | 0 | 0 | 0 | 0 | 0 | 0 | 1 | 0 | 0 | 0 | 0 | 1056 |
| NM_183043 | RNF6    | Coding | -0.225 | -0.338 | 145 | -13.97 | 0 | 0.006 | 0 | 0 | 0 | 0 | 0 | 0 | 1 | 0 | 0 | 0 | 0 | 1056 |
| NM_000903 | NQO1    | Coding | -0.225 | -0.321 | 142 | -15.63 | 0 | 0.006 | 0 | 0 | 0 | 0 | 0 | 0 | 1 | 0 | 0 | 0 | 0 | 1575 |
| NM_001025 | NQO1    | Coding | -0.225 | -0.321 | 142 | -15.63 | 0 | 0.006 | 0 | 0 | 0 | 0 | 0 | 0 | 1 | 0 | 0 | 0 | 0 | 1575 |
| NM_001025 | NQO1    | Coding | -0.225 | -0.321 | 142 | -15.63 | 0 | 0.006 | 0 | 0 | 0 | 0 | 0 | 0 | 1 | 0 | 0 | 0 | 0 | 1575 |

|           |           |        |        |        |     |        |   |       |   |   |   |   |   |   |   |   |   |   |   |      |
|-----------|-----------|--------|--------|--------|-----|--------|---|-------|---|---|---|---|---|---|---|---|---|---|---|------|
| NM_001286 | INQ01     | Coding | -0.225 | -0.321 | 142 | -15.63 | 0 | 0.006 | 0 | 0 | 0 | 0 | 0 | 0 | 1 | 0 | 0 | 0 | 0 | 1575 |
| NM_001195 | VAPB      | Coding | -0.225 | -0.407 | 158 | -15.67 | 0 | 0.006 | 0 | 0 | 0 | 0 | 0 | 0 | 1 | 0 | 0 | 0 | 0 | 6935 |
| NM_144975 | SLFN5     | Coding | -0.225 | -0.285 | 151 | -13.92 | 0 | 0.11  | 0 | 0 | 0 | 0 | 0 | 0 | 1 | 0 | 0 | 0 | 0 | 1854 |
| NM_001308 | MAPK9     | Coding | -0.225 | -0.275 | 154 | -15.89 | 0 | 0.006 | 0 | 0 | 0 | 0 | 0 | 0 | 1 | 0 | 0 | 0 | 0 | 1528 |
| NM_019601 | SUSD2     | Coding | -0.225 | -0.22  | 151 | -16.48 | 0 | 0.006 | 0 | 0 | 0 | 0 | 0 | 0 | 1 | 0 | 0 | 0 | 0 | 670  |
| NM_024901 | DENND2D   | Coding | -0.225 | -0.303 | 145 | -11.69 | 0 | 0.11  | 0 | 0 | 0 | 0 | 0 | 0 | 0 | 1 | 0 | 0 | 0 | 1636 |
| NM_001271 | DENND2D   | Coding | -0.225 | -0.303 | 145 | -11.69 | 0 | 0.11  | 0 | 0 | 0 | 0 | 0 | 0 | 0 | 1 | 0 | 0 | 0 | 1636 |
| NM_020848 | KIAA1462  | Coding | -0.224 | -0.318 | 149 | -16.33 | 0 | 0.11  | 0 | 0 | 0 | 0 | 0 | 0 | 0 | 1 | 0 | 0 | 0 | 5083 |
| NM_001123 | CCR2      | Coding | -0.224 | -0.238 | 147 | -18.21 | 0 | 0.006 | 0 | 0 | 0 | 0 | 0 | 0 | 1 | 0 | 0 | 0 | 0 | 767  |
| NM_001308 | TICRR     | Coding | -0.224 | -0.329 | 150 | -15.07 | 0 | 0.11  | 0 | 0 | 0 | 0 | 0 | 0 | 0 | 1 | 0 | 0 | 0 | 936  |
| NM_152259 | TICRR     | Coding | -0.224 | -0.329 | 150 | -15.07 | 0 | 0.11  | 0 | 0 | 0 | 0 | 0 | 0 | 0 | 1 | 0 | 0 | 0 | 936  |
| NM_002119 | HLA-D0A   | Coding | -0.224 | -0.339 | 146 | -16.39 | 0 | 0.006 | 0 | 0 | 0 | 0 | 0 | 0 | 1 | 0 | 0 | 0 | 0 | 2655 |
| NM_001083 | GPD2      | Coding | -0.223 | -0.304 | 166 | -30.59 | 0 | 0.006 | 0 | 0 | 0 | 0 | 0 | 0 | 1 | 0 | 0 | 0 | 0 | 3485 |
| NM_000408 | GPD2      | Coding | -0.223 | -0.304 | 166 | -30.59 | 0 | 0.006 | 0 | 0 | 0 | 0 | 0 | 0 | 1 | 0 | 0 | 0 | 0 | 3485 |
| NM_031412 | GABARAPL1 | Coding | -0.223 | -0.29  | 151 | -11.6  | 0 | 0.11  | 0 | 0 | 0 | 0 | 0 | 0 | 0 | 1 | 0 | 0 | 0 | 1273 |
| NM_177531 | PKHD1L1   | Coding | -0.223 | -0.298 | 144 | -13.39 | 0 | 0.006 | 0 | 0 | 0 | 0 | 0 | 0 | 1 | 0 | 0 | 0 | 0 | 1181 |
| NM_001145 | PTPRQ     | Coding | -0.223 | -0.339 | 148 | -18.62 | 0 | 0.006 | 0 | 0 | 0 | 0 | 0 | 0 | 1 | 0 | 0 | 0 | 0 | 1166 |
| NM_001322 | DHX8      | Coding | -0.223 | -0.256 | 148 | -18.62 | 0 | 0.006 | 0 | 0 | 0 | 0 | 0 | 0 | 1 | 0 | 0 | 0 | 0 | 588  |
| NM_004783 | TAOK2     | Coding | -0.223 | -0.215 | 147 | -15.35 | 0 | 0.006 | 0 | 0 | 0 | 0 | 0 | 0 | 1 | 0 | 0 | 0 | 0 | 693  |
| NM_001249 | ENTPD5    | Coding | -0.222 | -0.374 | 146 | -14.84 | 0 | 0.006 | 0 | 0 | 0 | 0 | 0 | 0 | 1 | 0 | 0 | 0 | 0 | 3697 |
| NM_001321 | ENTPD5    | Coding | -0.222 | -0.374 | 146 | -14.84 | 0 | 0.006 | 0 | 0 | 0 | 0 | 0 | 0 | 1 | 0 | 0 | 0 | 0 | 3697 |
| NM_001321 | ENTPD5    | Coding | -0.222 | -0.374 | 146 | -14.84 | 0 | 0.006 | 0 | 0 | 0 | 0 | 0 | 0 | 1 | 0 | 0 | 0 | 0 | 3697 |
| NM_001321 | ENTPD5    | Coding | -0.222 | -0.374 | 146 | -14.84 | 0 | 0.006 | 0 | 0 | 0 | 0 | 0 | 0 | 1 | 0 | 0 | 0 | 0 | 3697 |
| NM_001321 | ENTPD5    | Coding | -0.222 | -0.374 | 146 | -14.84 | 0 | 0.006 | 0 | 0 | 0 | 0 | 0 | 0 | 1 | 0 | 0 | 0 | 0 | 3697 |
| NM_139131 | NUP98     | Coding | -0.222 | -0.271 | 153 | -13.19 | 0 | 0.11  | 0 | 0 | 0 | 0 | 0 | 0 | 1 | 0 | 0 | 0 | 0 | 989  |
| NM_005387 | NUP98     | Coding | -0.222 | -0.271 | 153 | -13.19 | 0 | 0.11  | 0 | 0 | 0 | 0 | 0 | 0 | 0 | 1 | 0 | 0 | 0 | 989  |
| NM_001286 | MLLT3     | Coding | -0.221 | -0.296 | 153 | -16.3  | 0 | 0.11  | 0 | 0 | 0 | 0 | 0 | 0 | 0 | 1 | 0 | 0 | 0 | 4778 |
| NM_004529 | MLLT3     | Coding | -0.221 | -0.296 | 153 | -16.3  | 0 | 0.11  | 0 | 0 | 0 | 0 | 0 | 0 | 0 | 1 | 0 | 0 | 0 | 4778 |
| NM_001303 | VBPF1     | Coding | -0.221 | -0.273 | 153 | -10.3  | 0 | 0.11  | 0 | 0 | 0 | 0 | 0 | 0 | 0 | 1 | 0 | 0 | 0 | 999  |
| NM_003372 | VBPF1     | Coding | -0.221 | -0.273 | 153 | -10.3  | 0 | 0.11  | 0 | 0 | 0 | 0 | 0 | 0 | 0 | 1 | 0 | 0 | 0 | 999  |
| NM_001303 | VBPF1     | Coding | -0.221 | -0.273 | 153 | -10.3  | 0 | 0.11  | 0 | 0 | 0 | 0 | 0 | 0 | 0 | 1 | 0 | 0 | 0 | 999  |
| NM_001303 | VBPF1     | Coding | -0.221 | -0.273 | 153 | -10.3  | 0 | 0.11  | 0 | 0 | 0 | 0 | 0 | 0 | 0 | 1 | 0 | 0 | 0 | 999  |
| NM_017414 | USP18     | Coding | -0.221 | -0.265 | 143 | -9.76  | 0 | 0.11  | 0 | 0 | 0 | 0 | 0 | 0 | 0 | 1 | 0 | 0 | 0 | 578  |
| NM_001167 | CADM2     | Coding | -0.22  | -0.299 | 155 | -13.56 | 0 | 0.11  | 0 | 0 | 0 | 0 | 0 | 0 | 0 | 1 | 0 | 0 | 0 | 7646 |
| NM_001167 | CADM2     | Coding | -0.22  | -0.299 | 155 | -13.56 | 0 | 0.11  | 0 | 0 | 0 | 0 | 0 | 0 | 0 | 1 | 0 | 0 | 0 | 7646 |
| NM_001256 | CADM2     | Coding | -0.22  | -0.299 | 155 | -13.56 | 0 | 0.11  | 0 | 0 | 0 | 0 | 0 | 0 | 0 | 1 | 0 | 0 | 0 | 7646 |
| NM_001256 | CADM2     | Coding | -0.22  | -0.299 | 155 | -13.56 | 0 | 0.11  | 0 | 0 | 0 | 0 | 0 | 0 | 0 | 1 | 0 | 0 | 0 | 7646 |
| NM_001256 | CADM2     | Coding | -0.22  | -0.299 | 155 | -13.56 | 0 | 0.11  | 0 | 0 | 0 | 0 | 0 | 0 | 0 | 1 | 0 | 0 | 0 | 7646 |
| NM_001256 | CADM2     | Coding | -0.22  | -0.299 | 155 | -13.56 | 0 | 0.11  | 0 | 0 | 0 | 0 | 0 | 0 | 0 | 1 | 0 | 0 | 0 | 7646 |
| NM_153184 | CADM2     | Coding | -0.22  | -0.299 | 155 | -13.56 | 0 | 0.11  | 0 | 0 | 0 | 0 | 0 | 0 | 0 | 1 | 0 | 0 | 0 | 7646 |
| NM_001318 | ZNF514    | Coding | -0.22  | -0.341 | 165 | -23.52 | 0 | 0.006 | 0 | 0 | 0 | 0 | 0 | 0 | 1 | 0 | 0 | 0 | 0 | 4282 |
| NM_032788 | ZNF514    | Coding | -0.22  | -0.341 | 165 | -23.52 | 0 | 0.006 | 0 | 0 | 0 | 0 | 0 | 0 | 1 | 0 | 0 | 0 | 0 | 4282 |
| NM_000383 | AIRE      | Coding | -0.22  | -0.267 | 143 | -11.69 | 0 | 0.11  | 0 | 0 | 0 | 0 | 0 | 0 | 0 | 1 | 0 | 0 | 0 | 492  |
| NM_024819 | DCAKD     | Coding | -0.22  | -0.29  | 155 | -21.05 | 0 | 0.11  | 0 | 0 | 0 | 0 | 0 | 0 | 0 | 1 | 0 | 0 | 0 | 1095 |
| NM_001288 | DCAKD     | Coding | -0.22  | -0.29  | 155 | -21.05 | 0 | 0.11  | 0 | 0 | 0 | 0 | 0 | 0 | 0 | 1 | 0 | 0 | 0 | 1095 |
| NM_001288 | DCAKD     | Coding | -0.22  | -0.29  | 155 | -21.05 | 0 | 0.11  | 0 | 0 | 0 | 0 | 0 | 0 | 0 | 1 | 0 | 0 | 0 | 1095 |
| NM_001321 | DCAKD     | Coding | -0.22  | -0.29  | 155 | -21.05 | 0 | 0.11  | 0 | 0 | 0 | 0 | 0 | 0 | 0 | 1 | 0 | 0 | 0 | 1095 |
| NM_001128 | DCAKD     | Coding | -0.22  | -0.29  | 155 | -21.05 | 0 | 0.11  | 0 | 0 | 0 | 0 | 0 | 0 | 0 | 1 | 0 | 0 | 0 | 1095 |
| NM_133379 | TIN       | Coding | -0.22  | -0.319 | 156 | -14.42 | 0 | 0.11  | 0 | 0 | 0 | 0 | 0 | 0 | 0 | 1 | 0 | 0 | 0 | 1176 |
| NM_001009 | C12orf29  | Coding | -0.22  | -0.308 | 154 | -11.76 | 0 | 0.11  | 0 | 0 | 0 | 0 | 0 | 0 | 0 | 1 | 0 | 0 | 0 | 1738 |
| NM_001030 | AP2B1     | Coding | -0.22  | -0.284 | 163 | -21.86 | 0 | 0.006 | 0 | 0 | 0 | 0 | 0 | 0 | 1 | 0 | 0 | 0 | 0 | 2718 |
| NM_001282 | AP2B1     | Coding | -0.22  | -0.284 | 163 | -21.86 | 0 | 0.006 | 0 | 0 | 0 | 0 | 0 | 0 | 1 | 0 | 0 | 0 | 0 | 2718 |
| NM_001145 | HBS1L     | Coding | -0.219 | -0.383 | 148 | -14.2  | 0 | 0.006 | 0 | 0 | 0 | 0 | 0 | 0 | 1 | 0 | 0 | 0 | 0 | 4900 |
| NM_006620 | HBS1L     | Coding | -0.219 | -0.383 | 148 | -14.2  | 0 | 0.006 | 0 | 0 | 0 | 0 | 0 | 0 | 1 | 0 | 0 | 0 | 0 | 4900 |
| NM_001318 | QPRT      | Coding | -0.218 | -0.261 | 146 | -14.75 | 0 | 0.006 | 0 | 0 | 0 | 0 | 0 | 0 | 1 | 0 | 0 | 0 | 0 | 1289 |
| NM_001318 | QPRT      | Coding | -0.218 | -0.261 | 146 | -14.75 | 0 | 0.006 | 0 | 0 | 0 | 0 | 0 | 0 | 1 | 0 | 0 | 0 | 0 | 1289 |
| NM_014298 | QPRT      | Coding | -0.218 | -0.261 | 146 | -14.75 | 0 | 0.006 | 0 | 0 | 0 | 0 | 0 | 0 | 1 | 0 | 0 | 0 | 0 | 1289 |
| NM_018453 | EAPP      | Coding | -0.218 | -0.277 | 150 | -10.9  | 0 | 0.11  | 0 | 0 | 0 | 0 | 0 | 0 | 0 | 1 | 0 | 0 | 0 | 381  |
| NM_144657 | HDX       | Coding | -0.218 | -0.319 | 159 | -22.16 | 0 | 0.006 | 0 | 0 | 0 | 0 | 0 | 0 | 1 | 0 | 0 | 0 | 0 | 4015 |
| NM_001177 | HDX       | Coding | -0.218 | -0.319 | 159 | -22.16 | 0 | 0.006 | 0 | 0 | 0 | 0 | 0 | 0 | 1 | 0 | 0 | 0 | 0 | 4015 |

|                    |        |        |        |     |        |   |       |   |   |   |   |   |   |   |   |   |   |   |   |      |
|--------------------|--------|--------|--------|-----|--------|---|-------|---|---|---|---|---|---|---|---|---|---|---|---|------|
| NM_001177:HDX      | Coding | -0.218 | -0.319 | 159 | -22.16 | 0 | 0.006 | 0 | 0 | 0 | 0 | 0 | 0 | 1 | 0 | 0 | 0 | 0 | 0 | 4015 |
| NM_001102:OTUD4    | Coding | -0.218 | -0.356 | 150 | -15.13 | 0 | 0.006 | 0 | 0 | 0 | 0 | 0 | 0 | 1 | 0 | 0 | 0 | 0 | 0 | 3780 |
| NM_001025:DUT      | Coding | -0.218 | -0.365 | 150 | -14.59 | 0 | 0.006 | 0 | 0 | 0 | 0 | 0 | 0 | 1 | 0 | 0 | 0 | 0 | 0 | 1295 |
| NM_001025:DUT      | Coding | -0.218 | -0.365 | 150 | -14.59 | 0 | 0.006 | 0 | 0 | 0 | 0 | 0 | 0 | 1 | 0 | 0 | 0 | 0 | 0 | 1295 |
| NM_001948 DUT      | Coding | -0.218 | -0.365 | 150 | -14.59 | 0 | 0.006 | 0 | 0 | 0 | 0 | 0 | 0 | 1 | 0 | 0 | 0 | 0 | 0 | 1295 |
| NM_153015 TMEM74   | Coding | -0.217 | -0.386 | 147 | -14.59 | 0 | 0.006 | 0 | 0 | 0 | 0 | 0 | 0 | 1 | 0 | 0 | 0 | 0 | 0 | 5205 |
| NM_001177:HABP2    | Coding | -0.217 | -0.226 | 142 | -16.83 | 0 | 0.006 | 0 | 0 | 0 | 0 | 0 | 0 | 1 | 0 | 0 | 0 | 0 | 0 | 1232 |
| NM_004132 HABP2    | Coding | -0.217 | -0.226 | 142 | -16.83 | 0 | 0.006 | 0 | 0 | 0 | 0 | 0 | 0 | 1 | 0 | 0 | 0 | 0 | 0 | 1232 |
| NM_032547 SCOC     | Coding | -0.217 | -0.317 | 152 | -13.75 | 0 | 0.11  | 0 | 0 | 0 | 0 | 0 | 0 | 0 | 1 | 0 | 0 | 0 | 0 | 1452 |
| NM_001153:SCOC     | Coding | -0.217 | -0.317 | 152 | -13.75 | 0 | 0.11  | 0 | 0 | 0 | 0 | 0 | 0 | 0 | 1 | 0 | 0 | 0 | 0 | 1452 |
| NM_001153:SCOC     | Coding | -0.217 | -0.317 | 152 | -13.75 | 0 | 0.11  | 0 | 0 | 0 | 0 | 0 | 0 | 0 | 1 | 0 | 0 | 0 | 0 | 1452 |
| NM_001153:SCOC     | Coding | -0.217 | -0.317 | 152 | -13.75 | 0 | 0.11  | 0 | 0 | 0 | 0 | 0 | 0 | 0 | 1 | 0 | 0 | 0 | 0 | 1452 |
| NM_001153:SCOC     | Coding | -0.217 | -0.317 | 152 | -13.75 | 0 | 0.11  | 0 | 0 | 0 | 0 | 0 | 0 | 0 | 1 | 0 | 0 | 0 | 0 | 1452 |
| NM_001153:SCOC     | Coding | -0.217 | -0.317 | 152 | -13.75 | 0 | 0.11  | 0 | 0 | 0 | 0 | 0 | 0 | 0 | 1 | 0 | 0 | 0 | 0 | 1452 |
| NM_001153:SCOC     | Coding | -0.217 | -0.317 | 152 | -13.75 | 0 | 0.11  | 0 | 0 | 0 | 0 | 0 | 0 | 0 | 1 | 0 | 0 | 0 | 0 | 1452 |
| NM_001153:SCOC     | Coding | -0.217 | -0.317 | 152 | -13.75 | 0 | 0.11  | 0 | 0 | 0 | 0 | 0 | 0 | 0 | 1 | 0 | 0 | 0 | 0 | 1452 |
| NM_001258:SLC4A8   | Coding | -0.217 | -0.26  | 142 | -14.33 | 0 | 0.006 | 0 | 0 | 0 | 0 | 0 | 0 | 1 | 0 | 0 | 0 | 0 | 0 | 8325 |
| NM_001039:SLC4A8   | Coding | -0.217 | -0.26  | 142 | -14.33 | 0 | 0.006 | 0 | 0 | 0 | 0 | 0 | 0 | 1 | 0 | 0 | 0 | 0 | 0 | 8325 |
| NM_001099:GXYLT1   | Coding | -0.216 | -0.313 | 149 | -13.74 | 0 | 0.11  | 0 | 0 | 0 | 0 | 0 | 0 | 0 | 1 | 0 | 0 | 0 | 0 | 5940 |
| NM_173601 GXYLT1   | Coding | -0.216 | -0.313 | 149 | -13.74 | 0 | 0.11  | 0 | 0 | 0 | 0 | 0 | 0 | 0 | 1 | 0 | 0 | 0 | 0 | 5940 |
| NM_001277:EFS      | Coding | -0.216 | -0.247 | 146 | -15.35 | 0 | 0.006 | 0 | 0 | 0 | 0 | 0 | 0 | 1 | 0 | 0 | 0 | 0 | 0 | 826  |
| NM_005864 EFS      | Coding | -0.216 | -0.247 | 146 | -15.35 | 0 | 0.006 | 0 | 0 | 0 | 0 | 0 | 0 | 1 | 0 | 0 | 0 | 0 | 0 | 826  |
| NM_032459 EFS      | Coding | -0.216 | -0.247 | 146 | -15.35 | 0 | 0.006 | 0 | 0 | 0 | 0 | 0 | 0 | 1 | 0 | 0 | 0 | 0 | 0 | 826  |
| NM_172225 DMBX1    | Coding | -0.215 | -0.252 | 151 | -15.61 | 0 | 0.006 | 0 | 0 | 0 | 0 | 0 | 0 | 1 | 0 | 0 | 0 | 0 | 0 | 1720 |
| NM_147192 DMBX1    | Coding | -0.215 | -0.252 | 151 | -15.61 | 0 | 0.006 | 0 | 0 | 0 | 0 | 0 | 0 | 1 | 0 | 0 | 0 | 0 | 0 | 1720 |
| NM_024786 ZDHC11   | Coding | -0.215 | -0.233 | 150 | -15.88 | 0 | 0.006 | 0 | 0 | 0 | 0 | 0 | 0 | 1 | 0 | 0 | 0 | 0 | 0 | 983  |
| NM_006652 SPINT3   | Coding | -0.214 | -0.284 | 181 | -28.18 | 0 | 0.11  | 0 | 0 | 0 | 0 | 0 | 0 | 0 | 1 | 0 | 0 | 0 | 0 | 190  |
| NM_001278:LMCD1    | Coding | -0.214 | -0.26  | 154 | -15.74 | 0 | 0.11  | 0 | 0 | 0 | 0 | 0 | 0 | 0 | 1 | 0 | 0 | 0 | 0 | 1381 |
| NM_001145:PLIN1    | Coding | -0.213 | -0.275 | 148 | -12.44 | 0 | 0.11  | 0 | 0 | 0 | 0 | 0 | 0 | 0 | 1 | 0 | 0 | 0 | 0 | 1214 |
| NM_002666 PLIN1    | Coding | -0.213 | -0.275 | 148 | -12.44 | 0 | 0.11  | 0 | 0 | 0 | 0 | 0 | 0 | 0 | 1 | 0 | 0 | 0 | 0 | 1214 |
| NM_152400 C4orf32  | Coding | -0.213 | -0.354 | 155 | -17.1  | 0 | 0.006 | 0 | 0 | 0 | 0 | 0 | 0 | 1 | 0 | 0 | 0 | 0 | 0 | 2143 |
| NM_001168:SLFN1    | Coding | -0.213 | -0.258 | 142 | -12.94 | 0 | 0.006 | 0 | 0 | 0 | 0 | 0 | 0 | 1 | 0 | 0 | 0 | 0 | 0 | 509  |
| NM_001300:SLFN1    | Coding | -0.213 | -0.258 | 142 | -12.94 | 0 | 0.006 | 0 | 0 | 0 | 0 | 0 | 0 | 1 | 0 | 0 | 0 | 0 | 0 | 509  |
| NM_144990 SLFN1    | Coding | -0.213 | -0.258 | 142 | -12.94 | 0 | 0.006 | 0 | 0 | 0 | 0 | 0 | 0 | 1 | 0 | 0 | 0 | 0 | 0 | 509  |
| NM_001200:NPL      | Coding | -0.213 | -0.279 | 146 | -11.81 | 0 | 0.11  | 0 | 0 | 0 | 0 | 0 | 0 | 0 | 1 | 0 | 0 | 0 | 0 | 705  |
| NM_001200:NPL      | Coding | -0.213 | -0.279 | 146 | -11.81 | 0 | 0.11  | 0 | 0 | 0 | 0 | 0 | 0 | 0 | 1 | 0 | 0 | 0 | 0 | 705  |
| NM_001307:ARID3B   | Coding | -0.213 | -0.258 | 144 | -13.92 | 0 | 0.006 | 0 | 0 | 0 | 0 | 0 | 0 | 1 | 0 | 0 | 0 | 0 | 0 | 2357 |
| NM_006465 ARID3B   | Coding | -0.213 | -0.258 | 144 | -13.92 | 0 | 0.006 | 0 | 0 | 0 | 0 | 0 | 0 | 1 | 0 | 0 | 0 | 0 | 0 | 2357 |
| NM_001202:NIPSNAP1 | Coding | -0.213 | -0.263 | 158 | -13.45 | 0 | 0.006 | 0 | 0 | 0 | 0 | 0 | 0 | 1 | 0 | 0 | 0 | 0 | 0 | 1126 |
| NM_003634 NIPSNAP1 | Coding | -0.213 | -0.263 | 158 | -13.45 | 0 | 0.006 | 0 | 0 | 0 | 0 | 0 | 0 | 1 | 0 | 0 | 0 | 0 | 0 | 1126 |
| NM_031244 SIRT5    | Coding | -0.212 | -0.29  | 148 | -14.3  | 0 | 0.006 | 0 | 0 | 0 | 0 | 0 | 0 | 1 | 0 | 0 | 0 | 0 | 0 | 1220 |
| NM_032126 TEX35    | Coding | -0.212 | -0.262 | 156 | -16.71 | 0 | 0.11  | 0 | 0 | 0 | 0 | 0 | 0 | 0 | 1 | 0 | 0 | 0 | 0 | 214  |
| NM_001301:ZBTB44   | Coding | -0.211 | -0.347 | 162 | -22.22 | 0 | 0.006 | 0 | 0 | 0 | 0 | 0 | 0 | 1 | 0 | 0 | 0 | 0 | 0 | 5038 |
| NM_025153 ATP10B   | Coding | -0.211 | -0.298 | 163 | -20.09 | 0 | 0.006 | 0 | 0 | 0 | 0 | 0 | 0 | 1 | 0 | 0 | 0 | 0 | 0 | 2333 |
| NM_001200:NPL      | Coding | -0.211 | -0.278 | 146 | -11.81 | 0 | 0.11  | 0 | 0 | 0 | 0 | 0 | 0 | 0 | 1 | 0 | 0 | 0 | 0 | 1661 |
| NM_001200:NPL      | Coding | -0.211 | -0.278 | 146 | -11.81 | 0 | 0.11  | 0 | 0 | 0 | 0 | 0 | 0 | 0 | 1 | 0 | 0 | 0 | 0 | 1476 |
| NM_030769 NPL      | Coding | -0.211 | -0.278 | 146 | -11.81 | 0 | 0.11  | 0 | 0 | 0 | 0 | 0 | 0 | 0 | 1 | 0 | 0 | 0 | 0 | 1476 |
| NM_001143:ZBED5    | Coding | -0.211 | -0.258 | 152 | -14.42 | 0 | 0.11  | 0 | 0 | 0 | 0 | 0 | 0 | 0 | 1 | 0 | 0 | 0 | 0 | 160  |
| NM_021211 ZBED5    | Coding | -0.211 | -0.258 | 152 | -14.42 | 0 | 0.11  | 0 | 0 | 0 | 0 | 0 | 0 | 0 | 1 | 0 | 0 | 0 | 0 | 160  |
| NM_144659 TCP10L   | Coding | -0.211 | -0.229 | 160 | -19.85 | 0 | 0.006 | 0 | 0 | 0 | 0 | 0 | 0 | 1 | 0 | 0 | 0 | 0 | 0 | 1933 |
| NM_001170:LARP4    | Coding | -0.21  | -0.261 | 145 | -10.53 | 0 | 0.11  | 0 | 0 | 0 | 0 | 0 | 0 | 0 | 1 | 0 | 0 | 0 | 0 | 4141 |
| NM_001170:LARP4    | Coding | -0.21  | -0.261 | 145 | -10.53 | 0 | 0.11  | 0 | 0 | 0 | 0 | 0 | 0 | 0 | 1 | 0 | 0 | 0 | 0 | 4141 |
| NM_052879 LARP4    | Coding | -0.21  | -0.261 | 145 | -10.53 | 0 | 0.11  | 0 | 0 | 0 | 0 | 0 | 0 | 0 | 1 | 0 | 0 | 0 | 0 | 4141 |
| NM_199188 LARP4    | Coding | -0.21  | -0.261 | 145 | -10.53 | 0 | 0.11  | 0 | 0 | 0 | 0 | 0 | 0 | 0 | 1 | 0 | 0 | 0 | 0 | 4141 |
| NM_199190 LARP4    | Coding | -0.21  | -0.261 | 145 | -10.53 | 0 | 0.11  | 0 | 0 | 0 | 0 | 0 | 0 | 0 | 1 | 0 | 0 | 0 | 0 | 4141 |
| NM_001278:CORIN    | Coding | -0.21  | -0.282 | 156 | -14.77 | 0 | 0.11  | 0 | 0 | 0 | 0 | 0 | 0 | 0 | 1 | 0 | 0 | 0 | 0 | 1723 |
| NM_006587 CORIN    | Coding | -0.21  | -0.282 | 156 | -14.77 | 0 | 0.11  | 0 | 0 | 0 | 0 | 0 | 0 | 0 | 1 | 0 | 0 | 0 | 0 | 1723 |
| NM_001145:SCRN2    | Coding | -0.209 | -0.187 | 144 | -16.03 | 0 | 0.006 | 0 | 0 | 0 | 0 | 0 | 0 | 1 | 0 | 0 | 0 | 0 | 0 | 571  |
| NM_025268 TMEM121  | Coding | -0.209 | -0.241 | 158 | -17.26 | 0 | 0.006 | 0 | 0 | 0 | 0 | 0 | 0 | 1 | 0 | 0 | 0 | 0 | 0 | 408  |
| NM_001130:MYO1B    | Coding | -0.209 | -0.267 | 155 | -12.95 | 0 | 0.11  | 0 | 0 | 0 | 0 | 0 | 0 | 0 | 1 | 0 | 0 | 0 | 0 | 1429 |

|           |                |        |        |        |     |        |   |       |   |   |   |   |   |   |   |   |   |   |   |      |
|-----------|----------------|--------|--------|--------|-----|--------|---|-------|---|---|---|---|---|---|---|---|---|---|---|------|
| NM_012223 | MYO1B          | Coding | -0.209 | -0.267 | 155 | -12.95 | 0 | 0.11  | 0 | 0 | 0 | 0 | 0 | 0 | 1 | 0 | 0 | 0 | 0 | 1429 |
| NM_001161 | MYO1B          | Coding | -0.209 | -0.267 | 155 | -12.95 | 0 | 0.11  | 0 | 0 | 0 | 0 | 0 | 0 | 1 | 0 | 0 | 0 | 0 | 1429 |
| NM_001110 | ADAM10         | Coding | -0.209 | -0.264 | 151 | -12.98 | 0 | 0.11  | 0 | 0 | 0 | 0 | 0 | 0 | 1 | 0 | 0 | 0 | 0 | 2343 |
| NM_001320 | ADAM10         | Coding | -0.209 | -0.264 | 151 | -12.98 | 0 | 0.11  | 0 | 0 | 0 | 0 | 0 | 0 | 1 | 0 | 0 | 0 | 0 | 2343 |
| NM_001270 | MEAF6          | Coding | -0.208 | -0.279 | 149 | -13.43 | 0 | 0.11  | 0 | 0 | 0 | 0 | 0 | 0 | 1 | 0 | 0 | 0 | 0 | 3809 |
| NM_001320 | ADD3           | Coding | -0.207 | -0.257 | 147 | -15.96 | 0 | 0.11  | 0 | 0 | 0 | 0 | 0 | 0 | 1 | 0 | 0 | 0 | 0 | 1947 |
| NM_001320 | ADD3           | Coding | -0.207 | -0.257 | 147 | -15.96 | 0 | 0.11  | 0 | 0 | 0 | 0 | 0 | 0 | 1 | 0 | 0 | 0 | 0 | 1947 |
| NM_019903 | ADD3           | Coding | -0.207 | -0.257 | 147 | -15.96 | 0 | 0.11  | 0 | 0 | 0 | 0 | 0 | 0 | 1 | 0 | 0 | 0 | 0 | 1947 |
| NM_001121 | ADD3           | Coding | -0.207 | -0.257 | 147 | -15.96 | 0 | 0.11  | 0 | 0 | 0 | 0 | 0 | 0 | 1 | 0 | 0 | 0 | 0 | 1947 |
| NM_001320 | ADD3           | Coding | -0.207 | -0.257 | 147 | -15.96 | 0 | 0.11  | 0 | 0 | 0 | 0 | 0 | 0 | 1 | 0 | 0 | 0 | 0 | 1947 |
| NM_016824 | ADD3           | Coding | -0.207 | -0.257 | 147 | -15.96 | 0 | 0.11  | 0 | 0 | 0 | 0 | 0 | 0 | 1 | 0 | 0 | 0 | 0 | 1947 |
| NM_001320 | ADD3           | Coding | -0.207 | -0.257 | 147 | -15.96 | 0 | 0.11  | 0 | 0 | 0 | 0 | 0 | 0 | 1 | 0 | 0 | 0 | 0 | 1947 |
| NM_000088 | COL1A1         | Coding | -0.207 | -0.259 | 153 | -13.55 | 0 | 0.11  | 0 | 0 | 0 | 0 | 0 | 0 | 1 | 0 | 0 | 0 | 0 | 1406 |
| NM_018356 | C5orf22        | Coding | -0.206 | -0.268 | 147 | -14.94 | 0 | 0.11  | 0 | 0 | 0 | 0 | 0 | 0 | 1 | 0 | 0 | 0 | 0 | 2156 |
| NM_020393 | PGLYRP4        | Coding | -0.206 | -0.25  | 149 | -15.5  | 0 | 0.11  | 0 | 0 | 0 | 0 | 0 | 0 | 1 | 0 | 0 | 0 | 0 | 646  |
| NM_001318 | EAPP           | Coding | -0.206 | -0.269 | 150 | -10.9  | 0 | 0.11  | 0 | 0 | 0 | 0 | 0 | 0 | 1 | 0 | 0 | 0 | 0 | 701  |
| NM_001158 | AOC2           | Coding | -0.206 | -0.255 | 146 | -12.98 | 0 | 0.11  | 0 | 0 | 0 | 0 | 0 | 0 | 1 | 0 | 0 | 0 | 0 | 359  |
| NM_009590 | AOC2           | Coding | -0.206 | -0.255 | 146 | -12.98 | 0 | 0.11  | 0 | 0 | 0 | 0 | 0 | 0 | 1 | 0 | 0 | 0 | 0 | 359  |
| NM_152860 | SP7            | Coding | -0.206 | -0.208 | 146 | -13.38 | 0 | 0.006 | 0 | 0 | 0 | 0 | 0 | 1 | 0 | 0 | 0 | 0 | 0 | 1570 |
| NM_001173 | SP7            | Coding | -0.206 | -0.208 | 146 | -13.38 | 0 | 0.006 | 0 | 0 | 0 | 0 | 0 | 1 | 0 | 0 | 0 | 0 | 0 | 1570 |
| NM_001300 | SP7            | Coding | -0.206 | -0.208 | 146 | -13.38 | 0 | 0.006 | 0 | 0 | 0 | 0 | 0 | 1 | 0 | 0 | 0 | 0 | 0 | 1570 |
| NM_152601 | ZNF709         | Coding | -0.205 | -0.281 | 152 | -19.17 | 0 | 0.11  | 0 | 0 | 0 | 0 | 0 | 0 | 1 | 0 | 0 | 0 | 0 | 2812 |
| NM_001321 | ZNF471         | Coding | -0.205 | -0.222 | 149 | -21.13 | 0 | 0.006 | 0 | 0 | 0 | 0 | 0 | 1 | 0 | 0 | 0 | 0 | 0 | 4266 |
| NM_020813 | ZNF471         | Coding | -0.205 | -0.222 | 149 | -21.13 | 0 | 0.006 | 0 | 0 | 0 | 0 | 0 | 1 | 0 | 0 | 0 | 0 | 0 | 4266 |
| NM_001017 | SUGP2          | Coding | -0.205 | -0.281 | 160 | -18.19 | 0 | 0.006 | 0 | 0 | 0 | 0 | 0 | 1 | 0 | 0 | 0 | 0 | 0 | 2854 |
| NM_001321 | SUGP2          | Coding | -0.205 | -0.281 | 160 | -18.19 | 0 | 0.006 | 0 | 0 | 0 | 0 | 0 | 1 | 0 | 0 | 0 | 0 | 0 | 2854 |
| NM_001256 | S100PBP        | Coding | -0.205 | -0.283 | 160 | -19.24 | 0 | 0.11  | 0 | 0 | 0 | 0 | 0 | 0 | 1 | 0 | 0 | 0 | 0 | 2841 |
| NM_022753 | S100PBP        | Coding | -0.205 | -0.283 | 160 | -19.24 | 0 | 0.11  | 0 | 0 | 0 | 0 | 0 | 0 | 1 | 0 | 0 | 0 | 0 | 2841 |
| NM_017998 | C9orf40        | Coding | -0.204 | -0.244 | 148 | -15.59 | 0 | 0.11  | 0 | 0 | 0 | 0 | 0 | 0 | 1 | 0 | 0 | 0 | 0 | 1465 |
| NM_001198 | CCDC169-SOHLH2 | Coding | -0.204 | -0.255 | 154 | -14.66 | 0 | 0.11  | 0 | 0 | 0 | 0 | 0 | 0 | 1 | 0 | 0 | 0 | 0 | 826  |
| NM_017826 | SOHLH2         | Coding | -0.204 | -0.255 | 154 | -14.66 | 0 | 0.11  | 0 | 0 | 0 | 0 | 0 | 0 | 1 | 0 | 0 | 0 | 0 | 826  |
| NM_001199 | LRBA           | Coding | -0.204 | -0.261 | 146 | -12.35 | 0 | 0.11  | 0 | 0 | 0 | 0 | 0 | 0 | 1 | 0 | 0 | 0 | 0 | 1063 |
| NM_006726 | LRBA           | Coding | -0.204 | -0.261 | 146 | -12.35 | 0 | 0.11  | 0 | 0 | 0 | 0 | 0 | 0 | 1 | 0 | 0 | 0 | 0 | 1063 |
| NM_004642 | CDK2AP1        | Coding | -0.204 | -0.273 | 159 | -20.93 | 0 | 0.11  | 0 | 0 | 0 | 0 | 0 | 0 | 1 | 0 | 0 | 0 | 0 | 766  |
| NM_001270 | CDK2AP1        | Coding | -0.204 | -0.273 | 159 | -20.93 | 0 | 0.11  | 0 | 0 | 0 | 0 | 0 | 0 | 1 | 0 | 0 | 0 | 0 | 766  |
| NM_001270 | CDK2AP1        | Coding | -0.204 | -0.273 | 159 | -20.93 | 0 | 0.11  | 0 | 0 | 0 | 0 | 0 | 0 | 1 | 0 | 0 | 0 | 0 | 766  |
| NM_001190 | CTH            | Coding | -0.203 | -0.26  | 142 | -12.35 | 0 | 0.11  | 0 | 0 | 0 | 0 | 0 | 0 | 1 | 0 | 0 | 0 | 0 | 724  |
| NM_001902 | CTH            | Coding | -0.203 | -0.26  | 142 | -12.35 | 0 | 0.11  | 0 | 0 | 0 | 0 | 0 | 0 | 1 | 0 | 0 | 0 | 0 | 724  |
| NM_153742 | CTH            | Coding | -0.203 | -0.26  | 142 | -12.35 | 0 | 0.11  | 0 | 0 | 0 | 0 | 0 | 0 | 1 | 0 | 0 | 0 | 0 | 724  |
| NM_001286 | TAF1           | Coding | -0.203 | -0.335 | 148 | -16.02 | 0 | 0.006 | 0 | 0 | 0 | 0 | 0 | 1 | 0 | 0 | 0 | 0 | 0 | 1959 |
| NM_004606 | TAF1           | Coding | -0.203 | -0.335 | 148 | -16.02 | 0 | 0.006 | 0 | 0 | 0 | 0 | 0 | 1 | 0 | 0 | 0 | 0 | 0 | 1959 |
| NM_138923 | TAF1           | Coding | -0.203 | -0.335 | 148 | -16.02 | 0 | 0.006 | 0 | 0 | 0 | 0 | 0 | 1 | 0 | 0 | 0 | 0 | 0 | 1959 |
| NM_017896 | GID8           | Coding | -0.203 | -0.363 | 147 | -16.33 | 0 | 0.006 | 0 | 0 | 0 | 0 | 0 | 1 | 0 | 0 | 0 | 0 | 0 | 3563 |
| NM_001304 | LDLRAD3        | Coding | -0.203 | -0.28  | 148 | -14.4  | 0 | 0.11  | 0 | 0 | 0 | 0 | 0 | 0 | 1 | 0 | 0 | 0 | 0 | 2739 |
| NM_001304 | LDLRAD3        | Coding | -0.203 | -0.28  | 148 | -14.4  | 0 | 0.11  | 0 | 0 | 0 | 0 | 0 | 0 | 1 | 0 | 0 | 0 | 0 | 2739 |
| NM_174902 | LDLRAD3        | Coding | -0.203 | -0.28  | 148 | -14.4  | 0 | 0.11  | 0 | 0 | 0 | 0 | 0 | 0 | 1 | 0 | 0 | 0 | 0 | 2739 |
| NM_000761 | CYP1A2         | Coding | -0.202 | -0.217 | 164 | -26.25 | 0 | 0.006 | 0 | 0 | 0 | 0 | 0 | 1 | 0 | 0 | 0 | 0 | 0 | 1512 |
| NM_002834 | PTPN11         | Coding | -0.202 | -0.253 | 140 | -9.89  | 0 | 0.11  | 0 | 0 | 0 | 0 | 0 | 0 | 1 | 0 | 0 | 0 | 0 | 4121 |
| NM_000769 | CYP2C19        | Coding | -0.202 | -0.247 | 142 | -14.02 | 0 | 0.006 | 0 | 0 | 0 | 0 | 0 | 1 | 0 | 0 | 0 | 0 | 0 | 291  |
| NM_003437 | ZNF136         | Coding | -0.202 | -0.283 | 144 | -14.01 | 0 | 0.006 | 0 | 0 | 0 | 0 | 0 | 1 | 0 | 0 | 0 | 0 | 0 | 1248 |
| NM_033050 | SUCNR1         | Coding | -0.202 | -0.321 | 148 | -16.44 | 0 | 0.006 | 0 | 0 | 0 | 0 | 0 | 1 | 0 | 0 | 0 | 0 | 0 | 3071 |
| NM_024516 | PAGR1          | Coding | -0.201 | -0.286 | 166 | -20.78 | 0 | 0.11  | 0 | 0 | 0 | 0 | 0 | 0 | 1 | 0 | 0 | 0 | 0 | 2741 |
| NM_001164 | GOLGA6C        | Coding | -0.201 | -0.272 | 165 | -23.93 | 0 | 0.11  | 0 | 0 | 0 | 0 | 0 | 0 | 1 | 0 | 0 | 0 | 0 | 3256 |
| NM_004946 | DOCK2          | Coding | -0.2   | -0.248 | 142 | -10.03 | 0 | 0.11  | 0 | 0 | 0 | 0 | 0 | 0 | 1 | 0 | 0 | 0 | 0 | 524  |
| NM_014879 | P2RY14         | Coding | -0.2   | -0.239 | 140 | -9.57  | 0 | 0.11  | 0 | 0 | 0 | 0 | 0 | 0 | 1 | 0 | 0 | 0 | 0 | 1183 |
| NM_001081 | P2RY14         | Coding | -0.2   | -0.239 | 140 | -9.57  | 0 | 0.11  | 0 | 0 | 0 | 0 | 0 | 0 | 1 | 0 | 0 | 0 | 0 | 1183 |
